1 Coordination of genome replication and anaphase entry by rDNA copy number in *S. cerevisiae*

2  
3 Elizabeth X. Kwan, Gina M. Alvino, Kelsey L. Lynch, Paula F. Levan, Haley M. Amemiya,  
4 Xiaobin S. Wang, Sarah A. Johnson, Joseph C. Sanchez, Madison A. Miller, Mackenzie Croy,  
5 Seung-been Lee, Maria Naushab, Josh T. Cuperus, Bonita J. Brewer, Christine Queitsch\*, and  
6 M. K. Raghuraman\*

7  
8 Department of Genome Sciences; University of Washington; Seattle, Washington, 98195; United  
9 States of America

10  
11 \*Corresponding authors (queitsch @ u.washington.edu; raghu @ u.washington.edu)

12 Further information and requests for resources and reagents should be directed to and will be  
13 fulfilled by M. K. Raghuraman (raghu @ u.washington.edu)

14  
15 **ABSTRACT**

16 Eukaryotes maintain hundreds of copies of ribosomal DNA (rDNA), many more than  
17 required for ribosome biogenesis, suggesting a yet undefined role for large rDNA arrays outside  
18 of ribosomal RNA synthesis. We demonstrate that reducing the *Saccharomyces cerevisiae* rDNA  
19 array to 35 copies, which is sufficient for ribosome function, shifts rDNA from being the latest  
20 replicating region in the genome to one of the earliest. This change in replication timing results  
21 in delayed genome-wide replication and classic replication defects. We present evidence that the  
22 requirement for rDNA to replicate late, which is conserved among eukaryotes, also coordinates  
23 the completion of genome replication with anaphase entry through the proper sequestration of  
24 the mitotic exit regulator Cdc14p in the rDNA-containing nucleolus. Our findings suggest that,  
25 instead of being a passive repetitive element, the large late-replicating rDNA array plays an  
26 active role in genome replication and cell cycle control.

27  
28 Keywords: rDNA, ribosomal DNA, replication, genome, Cdc14, Fob1, replication time,  
29 anaphase

31 **INTRODUCTION:**

32 Ribosomal DNA (rDNA) is uniquely situated at the intersection of ribosome biogenesis  
33 and genome replication, fundamental processes required for cell growth and proliferation. The  
34 rDNA sequence is comprised of four ribosomal RNA genes, which encode the core components  
35 of the ribosome; multiple rDNA copies are arranged in tandem to form large arrays. Many  
36 species have hundreds of rDNA copies per haploid genome: *e.g.*, 90-300 in *Saccharomyces*  
37 *cerevisiae*, 70-400 in *Caenorhabditis elegans*, 80-600 in *Drosophila melanogaster*, 500-2500 in  
38 *Arabidopsis thaliana*, and 30-800 in humans (Mohan and Ritossa, 1970; Morton et al., 2020;  
39 Parks et al., 2018; Thompson et al., 2013). As the high rDNA copy number is often in  
40 substantial excess of what is required to meet ribosome demands, the majority of rDNA repeats  
41 are silenced (Conconi et al., 1992, 1989; Dammann et al., 1993; French et al., 2003; McStay and  
42 Grummt, 2008; Ye and Eickbush, 2006). Nevertheless, active maintenance of seemingly  
43 overabundant rDNA copies is conserved (Nelson et al., 2019), hinting that high rDNA copy  
44 number may have roles beyond ribosome production.

45 The phenotypic consequences of rDNA copy number variation span a broad range of  
46 cellular processes. While ribosome deficiencies result when rDNA copy number drops below a  
47 certain threshold (Delany et al., 1994; French et al., 2003; Ritossa and Atwood, 1966; Sanchez et  
48 al., 2017), other phenotypes result from rDNA copy number variants that are sufficient for  
49 ribosome biogenesis (Gibbons et al., 2014; Ide et al., 2010; Lu et al., 2018; Michel et al., 2005;  
50 Paredes et al., 2011; Picart-Piccolo et al., 2020; Wang and Lemos, 2017; Xu et al., 2017).  
51 Additionally, the plastic nature of the rDNA locus allows copy number fluctuations in the face of  
52 stresses such as nutrient availability (Aldrich and Maggert, 2015) or replication defects (Ide et  
53 al., 2007; Lynch et al., 2019; Salim et al., 2017; Sanchez et al., 2017). Because rDNA copy  
54 number changes often occur in response to various forms of replication stress, we sought to ask  
55 whether the reverse is also true: does rDNA copy number variation impact genome stability by  
56 influencing genome replication?

57 Given the vast length of the highly repetitive rDNA arrays, replication initiation must  
58 occur within the rDNA sequence, as documented in several species (Bénard et al., 1995; Brewer  
59 and Fangman, 1988; Coffman et al., 2006; Hyrien and Méchali, 1992; Little et al., 1993; López-

60 estraño et al., 1998). Extensive characterization in the budding yeast *S. cerevisiae* has shown  
61 that each 9.1 kb repeat contains a potential origin of replication (rDNA Autonomously  
62 Replicating Sequence or rARS, (Brewer et al., 1992; Miller and Kowalski, 1993)). For a wild  
63 type yeast rDNA array of 150 copies, only 30-40 of the 150 replication origins are estimated to  
64 initiate replication (“fire”) within an S phase (Brewer and Fangman, 1988; Linskens and  
65 Huberman, 1988). Genome-wide origin firing is limited by the low abundance of initiation  
66 factors that promote the temporal staggering of origin activation (Collart et al., 2013; Lynch et  
67 al., 2019; Mantiero et al., 2011; Yoshida et al., 2013). Hyperactivation of rDNA replication  
68 diverts replication factors away from unique regions of the genome (Shyian et al., 2016; Yoshida  
69 et al., 2014) and leads to persistent underreplication of certain genomic regions (Foss et al.,  
70 2017). We reasoned that reduction of rDNA copy number from the wild type burden of 100-200  
71 copies would alleviate the competition for limiting initiation factors at the other 300 replication  
72 origins across the genome (Nieduszynski et al., 2007).

73 Here we assess genome replication in isogenic yeast strains with rDNA arrays that are  
74 either wild type in size (100-180 copies) or minimal (35 copies). Contrary to our expectations,  
75 we discovered that the minimal rDNA array does not reduce competition with non-rDNA  
76 origins, but instead drastically advances rDNA replication time and increases the density of  
77 active rDNA origins. The large burst of early rDNA initiations from the minimal rDNA array  
78 causes a delay in replication in the rest of the genome. Furthermore, loss of the replication fork  
79 barrier gene *FOB1* sensitizes minimal rDNA strains to DNA damage and premature exit into  
80 anaphase, suggesting new roles for both Fob1p and rDNA in monitoring S phase progression.  
81 These findings show that the rDNA array is not merely a passive repetitive element during  
82 replication, but an active force that coordinates genome replication and cell cycle progression.

83

## 84 **RESULTS:**

### 85 Strains with minimal rDNA arrays are not defective in ribosome production

86 We generated isogenic strains with a reduced rDNA array at the endogenous rDNA locus  
87 (Figure 1A) using the pRDN1-Hyg plasmid-based method (Chernoff et al., 1994; Kobayashi et

88 al., 2001; Kwan et al., 2013). About 20-25% of the isolates with rDNA reductions showed  
89 increased ploidy (Figure S1A-B). Because maintenance of reduced rDNA requires the deletion  
90 of *FOBI* to prevent rDNA recombination and expansion, we included both *FOBI* and *fob1Δ*  
91 strains with wild type rDNA arrays as control strains. We also examined strains with weakened  
92 rDNA origins (rDNA<sup>RM</sup>) (Kwan et al., 2013), which we hypothesized would further reduce  
93 rDNA replication initiation events and favor initiation at origins outside the rDNA locus. We  
94 generated strains with 35, 45, and 55 copies of rDNA and decided to focus on strains with the  
95 smallest rDNA array (minimal rDNA strains, 35 rDNA *fob1Δ* and 35 rDNA<sup>RM</sup> *fob1Δ*) in  
96 comparison and compared these strains to those with wild type copy number (170 rDNA, 180  
97 rDNA *fob1Δ*, and 100 rDNA<sup>RM</sup>).

98 Although previous work demonstrated that 35 rDNA copies are sufficient for wild type  
99 levels of rRNA synthesis and ribosome biogenesis (Dauban et al., 2019; French et al., 2003; Ide  
100 et al., 2010; Kim et al., 2006), we wanted to confirm the absence of ribosome biogenesis defects  
101 in the minimal rDNA strains. We assessed phenotypes due to ribosome insufficiency: slower  
102 growth rate, increased sensitivity to cycloheximide over a range of concentrations, and decreased  
103 relative 25S rRNA abundance (Abovich et al., 1985; Rosado et al., 2007; Sanchez et al., 2017).  
104 The minimal rDNA strains behaved similarly to the wild type rDNA controls in these assays  
105 (Figure S1C-E), confirming that rDNA reduction to 35 rDNA copies does not generate  
106 significant ribosome biogenesis defects.

107

#### 108 Minimal rDNA strains show reduced plasmid maintenance and increased sensitivity to MMS and 109 hydroxyurea

110 We examined the effects of rDNA copy number reduction on plasmid maintenance, a  
111 basic assay that identifies mutants with DNA replication defects on the basis of their poor ability  
112 to replicate plasmids (Maine et al., 1984; Shima et al., 2007; Tye, 1999). Because replication  
113 initiation at a plasmid origin is subject to the same competition for replication factors as genomic  
114 origins, we expected that strains with minimal rDNA arrays would show improved plasmid  
115 maintenance compared to the wild type rDNA controls. However, both minimal rDNA strains  
116 displayed high loss rates of the *ARSI* (Autonomously Replicating Sequence 1, (Stinchcomb et

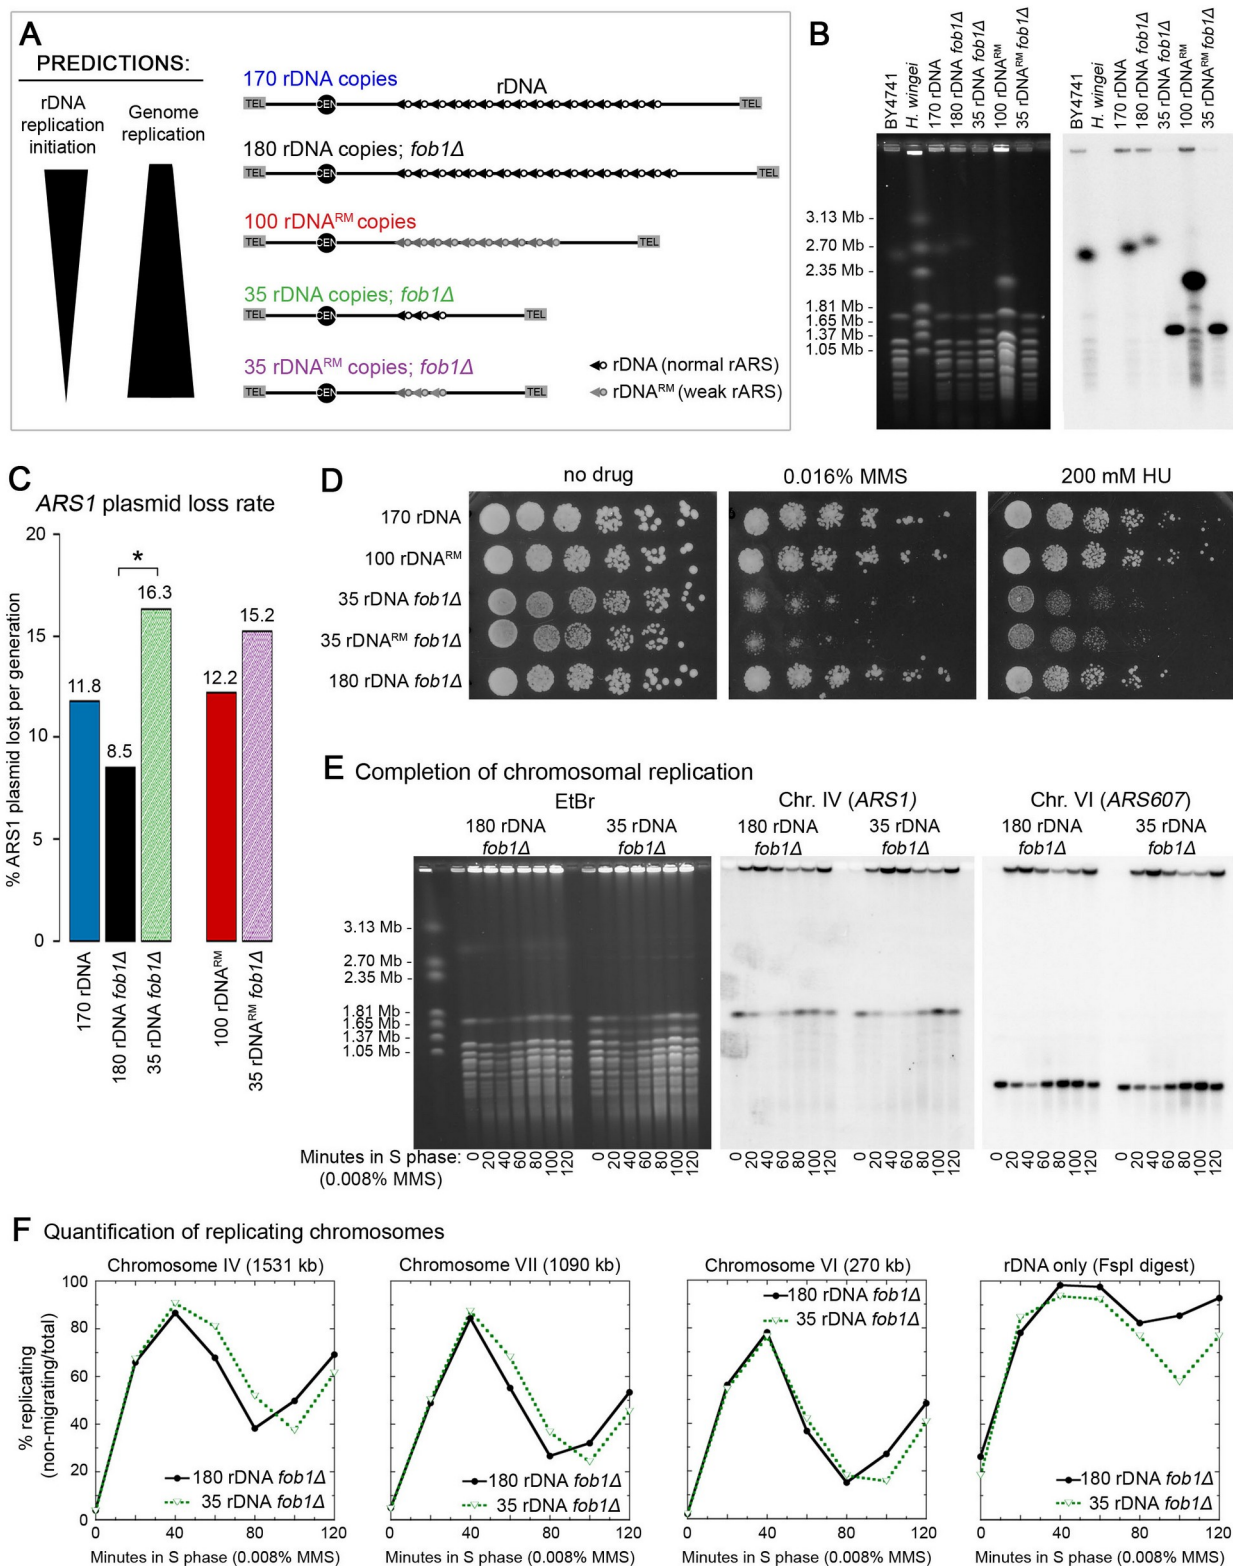

118 **Figure 1. Strains with minimal rDNA copy number exhibit non-rDNA replication defects.** (A)  
119 Depiction of rDNA arrays examined in this study and prediction of genome replication effects resulting  
120 from competition for replication factors. Strains differed at the rDNA locus in copy number and/or  
121 presence of a weak rDNA origin (rDNA<sup>RM</sup>). (B) CHEF gel confirmation of rDNA copy number.  
122 Ethidium bromide stained gel (left) and the resulting Southern blot (right) hybridized with a single copy  
123 Chr. XII probe (*CDC45*). (C) Loss of maintenance of an *ARS1*-containing plasmid was assessed in  
124 exponentially grown cultures. (\*) indicates significant difference in plasmid loss rate calculated from  
125 slope variance ( $p = 0.03$ ). (D) Spot assays for sensitivity to 200 mM HU and 0.016% MMS. (E)  
126 Migration assay of chromosomes from cells released into S phase in the presence of 0.08% MMS using  
127 CHEF gel electrophoresis and Southern blotting. Chromosomes are unable to migrate out of the  
128 plug/well while replicating (Hennessy & Botstein 1991), allowing for quantification of replicating vs.  
129 non-replicating chromosomes (fully replicated and unreplicated) by comparing the signal in the gel body  
130 vs. plug/well. Hybridization to specific sequences allows examination of individual chromosomes, IV  
131 and VI shown. (F) Quantification of the percentage of chromosomes undergoing replication in 0.008%  
132 MMS: chromosomes VI, IV, and VII as well as the isolated rDNA array. Completion of chromosome  
133 replication is reflected in the decrease of signal in the CHEF gel well.

134  
135 al., 1979)) test plasmid: 16.3%/generation for the minimal rDNA strain and 15.2%/generation for  
136 the minimal rDNA<sup>RM</sup> strain, almost double that of the control *foi1Δ* strain with wild type rDNA  
137 (8.5%/generation,  $p = 0.03$ ) and higher than either of the wild type rDNA *FOBI* strains  
138 (11.8%/generation and 12.2%/generation, Figure 1C). Since the Southern blot method reflects  
139 the amount of plasmid relative to genomic DNA sequences in the culture (Brewer and Fangman,  
140 1994), the observed differences can be ascribed to differences in plasmid replication rather than  
141 segregation. Counter to our prediction that rDNA reduction would improve DNA replication,  
142 the strains with minimal rDNA arrays instead showed defects in plasmid replication.

143 If minimal rDNA arrays are associated with defects in DNA replication, the strains  
144 carrying these arrays should be hypersensitive to conditions that induce replication stress and  
145 DNA damage (Shimada et al., 2002; Trabold et al., 2005). Hydroxyurea (HU) induces  
146 replication stress by inhibiting the production of dNTPs, which does not directly damage DNA  
147 (Alvino et al., 2007) but slows cell cycle progression through activation of the replication  
148 checkpoint (Santocanale and Diffley, 1998). In contrast, MMS is an alkylating agent that  
149 induces DNA damage (Paulovich and Hartwell, 1995). Consistent with previous work (Ide et  
150 al., 2010), strains with minimal rDNA showed greater sensitivity to DNA damage by MMS  
151 (Figure 1D). We found that rDNA reduction also conferred greater sensitivity to HU, suggesting  
152 that reducing rDNA copy number induces problems with both DNA replication and repair.

153

154 A minimal rDNA strain shows delayed replication completion across multiple chromosomes

155 To determine if rDNA reduction leads to chromosomal replication defects, we performed  
156 an S phase specific CHEF gel electrophoresis assay on strains with wild type or minimal rDNA  
157 copy number. In CHEF gel electrophoresis, chromosomes that are undergoing replication will  
158 not migrate from the well (Hennessy et al., 1991; Lynch et al., 2019), while non-replicating  
159 chromosomes, either those that are pre-replication or have completed replication, migrate into  
160 the gel at their expected sizes. To measure replication completion for individual chromosomes,  
161 we quantified the relative amount of Southern blot hybridization signal remaining in the well at  
162 20-minute intervals across a synchronous S phase. For this assay, G1 synchronized cells were  
163 released into S phase (Ide et al., 2010) and cell cycle progression was confirmed by flow  
164 cytometry (Figure S2A-B).

165 We examined replication completion for several chromosomes of different lengths as  
166 well as the rDNA array itself in *fob1Δ* strains with wild type or minimal rDNA. As expected,  
167 for samples collected in G1 prior to the onset of S phase, chromosomes migrated at their typical  
168 positions in the CHEF gel (0 minute samples, Figure 1E). After release into S phase, both strains  
169 began showing well-retention of chromosomes at the same time, indicating that the minimal  
170 rDNA strain does not have a delayed start of chromosomal replication. However, the two strains  
171 differed in their time of replication completion: Chromosomes IV (1531 kb) and VII (1090 kb)  
172 were delayed by 10-15 minutes in the 35 rDNA *fob1Δ* strain (Figure 1F, S1F). The extent of  
173 delay in replication completion appears to be proportional to chromosome length. We observed  
174 a smaller delay in replication completion for Chromosome II (813 kb) and barely any delay for  
175 chromosome VI (270 kb), the second smallest *S. cerevisiae* chromosome (Figure 1F, S1F-G).  
176 We had difficulty quantifying Chromosome XII (containing the rDNA locus) for the wild type  
177 rDNA strain: 56% of chromosome XII did not migrate into the gel, likely due to its large size  
178 (Figure S1F, H). We instead quantified replication completion of intact rDNA arrays, using a  
179 digest to separate the rDNA locus from its chromosomal context (Figure S1F). We found that a  
180 higher fraction of the minimal rDNA array completed replication than the wild type rDNA array  
181 (Figure 1F). We conclude that the minimal rDNA strain shows significant genome-wide delays

182 in completing chromosomal replication but fewer problems with completion of rDNA  
183 replication.

184

#### 185 Minimal rDNA strains advance rDNA replication and delay genome-wide replication

186 To investigate the kinetics of genome-wide replication in strains with reduced rDNA  
187 copy number, we performed density transfer experiments. Density transfer experiments exploit  
188 the semi-conservative nature of DNA replication to distinguish newly replicated DNA from  
189 unreplicated DNA at defined loci in the genome. Cells are grown in isotopically dense  
190 (“heavy”) medium, synchronized, and released into isotopically normal (“light”) medium such  
191 that the newly replicated DNA forms a “heavy/light” hybrid molecule. Hybrid replicated DNA  
192 can be resolved from unreplicated dense DNA by cesium chloride gradient fractionation and  
193 analyzed using quantitative Southern blotting and microarrays (Alvino et al., 2007; Raghuraman  
194 et al., 2001). Although this method cannot distinguish active origin firing from passive DNA  
195 replication, it allows us to identify replication differences across the genome. We collected  
196 samples across an S phase and assessed replication kinetics both on an individual locus level and  
197 on a genome-wide scale, confirming with flow cytometry that the minimal and wild type rDNA  
198 strains showed similar G1 arrest and progression through S phase (Figure S2C).

199 We initially focused on the rDNA locus, which is late-replicating in *S. cerevisiae* and  
200 several metazoan eukaryotic species (Coffman et al., 2005; Concia et al., 2018; Foss et al., 2017;  
201 Labit et al., 2008; Schübeler et al., 2002). We calculated rDNA  $T_{rep}$ , the time at which half-  
202 maximal replication was achieved, for each strain. While the rDNA locus was indeed late-  
203 replicating in the wild type strain ( $T_{rep} = 40.0'$ ), the minimal rDNA array replicated earlier with a  
204  $T_{rep}$  of 28.9' (Figure 2A-B, S3A). In fact, the minimal rDNA locus was one of the earliest loci to  
205 replicate rather than one of the latest (Figure 2B). The minimal rDNA<sup>RM</sup> array showed a similar  
206 advancement of replication time (Figure S3B), indicating that minimal rDNA arrays replicate  
207 early regardless of the rARS allele.

208 Because this drastic shift of rDNA replication timing from late to early might affect the  
209 order in which replication factors are recruited to other genomic origins, we compared the



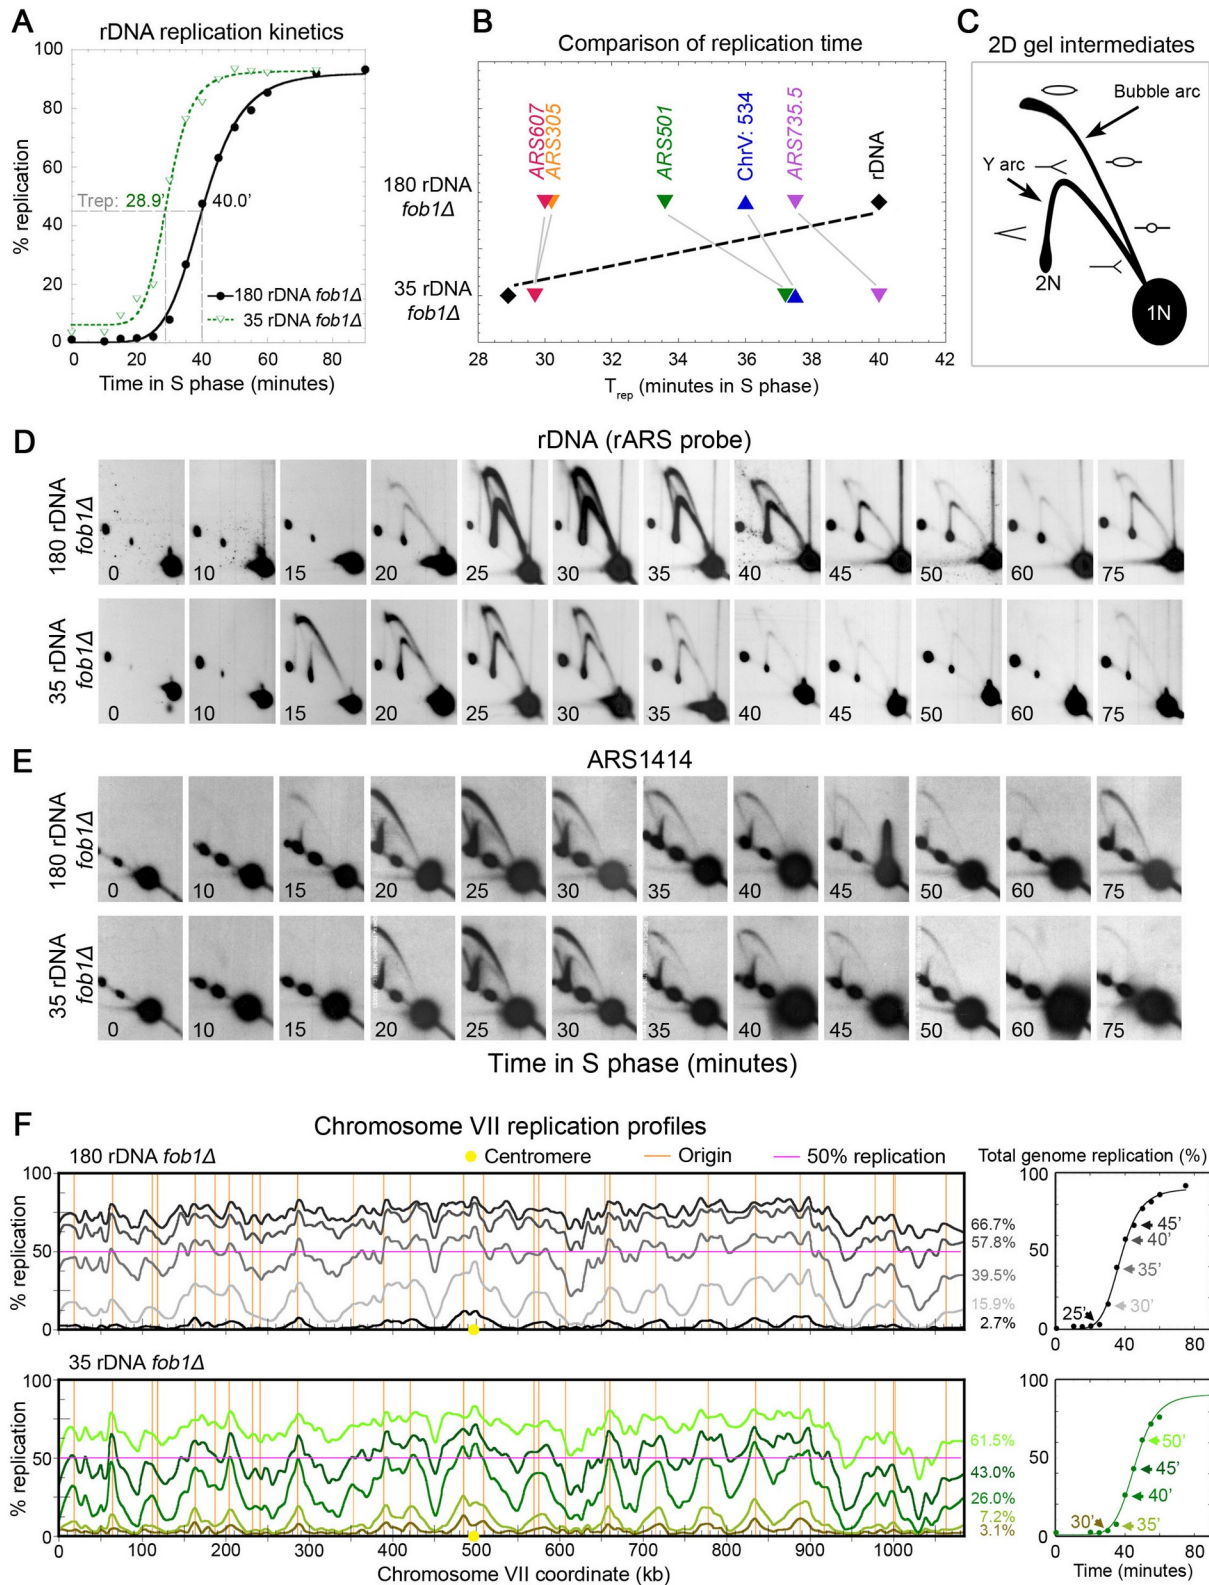

211 **Figure 2: A minimal rDNA array replicates early and delays genome replication.**

212 We calculated rDNA  $T_{rep}$ , the time at which half-maximal replication was achieved, for several loci. (A)  
213 The minimal rDNA array replicates 11 minutes earlier than the 180-copy rDNA array. Replication kinetic  
214 curves were generated from density transfer slot blot analysis. (B) Index of  $T_{rep}$  for different replication  
215 origins and genomic region Chr. V: 534. (C) Diagram of a 2D gel showing locations of actively  
216 replicating bubble or passively replicating Y intermediates. (D,E) 2D gel analysis of the rDNA origin of  
217 replication (rARS) and *ARS1414* throughout S phase. (F) Replicating DNA from multiple density  
218 transfer samples representing different time points were hybridized to microarrays and used to generate  
219 genome-wide replication profiles. Chromosome VII replication profiles across S phase for the 180 rDNA  
220 *fov1Δ* strain (top) and the 35 rDNA *fov1Δ* strain (bottom). Total genomic replication levels and time  
221 interval are indicated on the right. Locations of centromere and origins of replication are noted by yellow  
222 circles or orange lines. 50% replication threshold is denoted by pink horizontal line.

223

224 replication kinetics for several other genomic loci (Figure 2B, S3C-D, Table S2). *ARS305* and  
225 *ARS607*, two of the earliest and most efficient replication origins in *S. cerevisiae* (Friedman et  
226 al., 1997; Hoang et al., 2007), did not differ greatly in timing between the minimal and wild type  
227 rDNA strains. However, the late-replicating loci *ARS501* (also called *ARS522*), *ARS735.5*, and  
228 ChrV:534000 without an origin (Ferguson and Fangman, 1992) were delayed in the minimal  
229 rDNA strain, while their relative replication order was maintained.

230

231 **Altered replication timing is due to altered time of origin initiation**

232 The observed shifts of replication timing could be the result of changes to the time of  
233 origin activation and/or efficiency. Although the rDNA kinetic curves (Figure 2A) suggested  
234 that the minimal rDNA array began replicating earlier than the wild type array, we wanted to  
235 directly examine replication initiation using 2D gel electrophoresis of synchronized cells  
236 sampled across S phase. If the time of replication initiation was altered, we should observe  
237 differences in when the replication “bubble” arc becomes visible among our strains (Figure 2C).  
238 Strong rDNA origin (rARS) initiation in the minimal rDNA locus began robustly at 15 minutes  
239 into S phase, whereas the wild type rDNA locus initiated replication later (at 20 minutes) (Figure  
240 2D). These results confirm that early rDNA origin initiation is responsible for the earlier  
241 replication of the minimal rDNA locus seen by density transfer.

242 The altered replication timing of other genomic loci was also confirmed by 2D gels. In  
243 the minimal rDNA strain, we observed ~5-minute delays in replication initiation at late origins

244 such as *ARS1414* and *ARS735.5* (Figure 2E, S3E), with no apparent change in cumulative origin  
245 use. We found no difference in initiation timing at the early, efficient *ARS305* (Figure S3F),  
246 which reflects the density transfer data and is consistent with both the minimal rDNA and wild  
247 type strains entering S phase at the same time. We conclude that the changes to replication  
248 timing in the minimal rDNA strain are due to altered time of replication initiation at the rDNA  
249 and at late non-rDNA origins of replication.

250

### 251 Delayed replication progression is seen genome-wide in the minimal rDNA strains

252 Since individual loci exhibited altered replication timing, we wanted to examine the  
253 effects genome-wide in strains with early-replicating minimal rDNA arrays. We hybridized the  
254 fractionated density transfer samples to microarrays and plotted percent replication against  
255 chromosomal coordinates; these plots create chromosomal profiles that describe the landscape of  
256 replication over time (Alvino et al., 2007; Raghuraman et al., 2001). We picked the earliest S  
257 phase sample in which replication was detected and the three subsequent 5-minute intervals. In  
258 the earliest sample with detectable hybrid density DNA at replication origins, we found only  
259 subtle differences between the replication profiles of the minimal rDNA strain and that of the  
260 wild type strain. (3.1% vs. 2.7% genome replicated, Figure 2F, S4, S5A-B). However, at the  
261 next 5 minute interval, the minimal rDNA strain showed lower levels of replication completion  
262 (7.2% genome replicated) compared to the wild type strain (15.9%) (Figure S5A). This trend  
263 continued for the subsequent intervals, consistent with slower advancement of replication across  
264 the genome for the minimal rDNA strain. We did not identify any specific genomic regions that  
265 were preferentially altered in their replication profile; chromosome-wide replication profiles  
266 from the minimal rDNA strain and wild type rDNA strain are superimposable when they achieve  
267 similar levels of genome replication (Figure S5B). These data, together with the single locus  
268 data, demonstrate that the minimal rDNA strain exhibits genome-wide replication delay without  
269 region-specific effects.

270

271

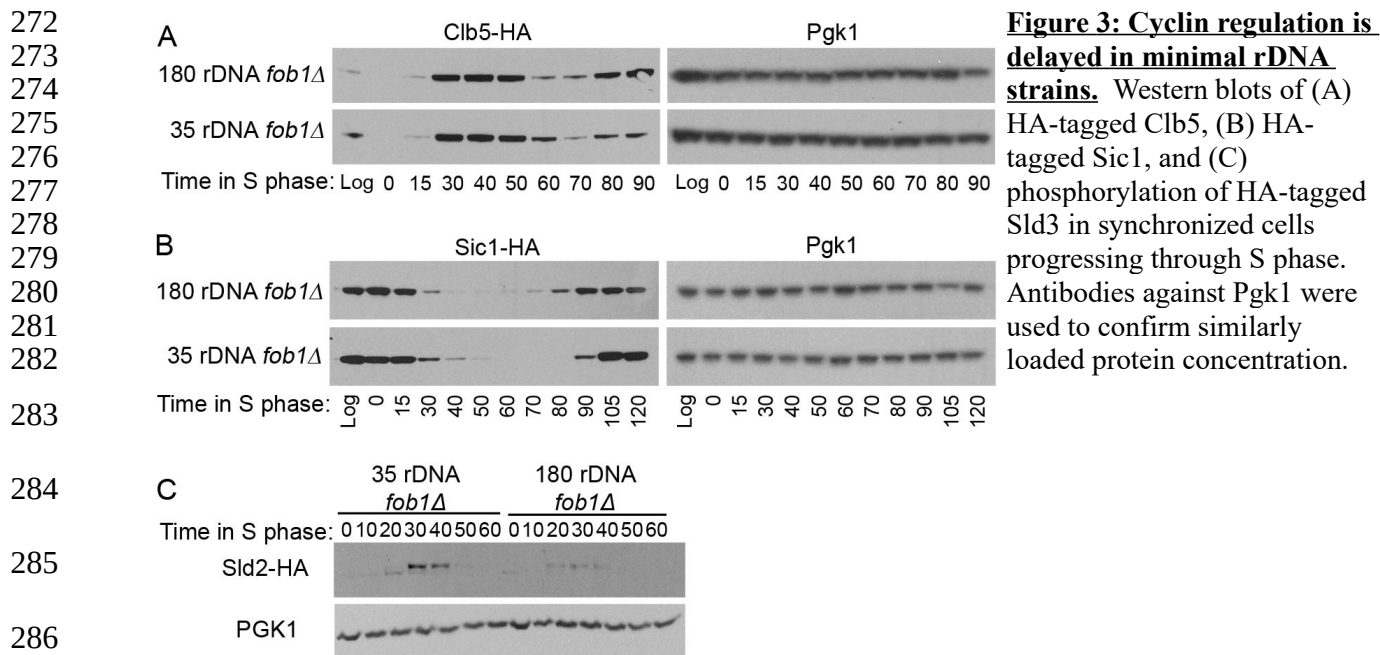

**Figure 3: Cyclin regulation is delayed in minimal rDNA strains.** Western blots of (A) HA-tagged Clb5, (B) HA-tagged Sic1, and (C) phosphorylation of HA-tagged Sld3 in synchronized cells progressing through S phase. Antibodies against Pgk1 were used to confirm similarly loaded protein concentration.

### Cyclin regulation reflects DNA replication delays in cells with minimal rDNA

289 Delayed completion of genome replication should manifest as delayed appearance of cell  
290 cycle landmarks. Such landmarks include the degradation of the CDK activator Clb5p (Schwob  
291 and Nasmyth, 1993), the phosphorylation of limiting initiation factor Sld2p (Bloom and Cross,  
292 2007; Lynch et al., 2019; Masumoto et al., 2002), and the reinstatement of the CDK inhibitor  
293 Sic1p (Barberis et al., 2012; Khmelinskii et al., 2007; Schwob et al., 1994; Verma et al., 1997).  
294 We separately tagged Clb5p, Sld2p, and Sic1p at their endogenous loci using a 3HA tag  
295 (Longtine et al., 1998) in both the minimal rDNA and wild type rDNA strains. We then  
296 collected synchronized samples for each strain throughout S phase for analysis via flow  
297 cytometry and western blotting. The tagged minimal rDNA and wild type rDNA strains showed  
298 similar S phase progression (Figure S2E). However, for cyclin signaling, the minimal rDNA  
299 strain showed ~10-minute delays in the degradation of Clb5p-HA, the phosphorylation of Sld2p-  
300 HA, and the degradation and reappearance of Sic1p-HA (Figure S3A-C). These delays in cyclin  
301 signaling in the minimal rDNA strain match the strain's delayed genome-wide replication.

302

303 How many rDNA origins in the minimal rDNA array initiate replication during early S phase?

304           Approximately one in five of the rDNA origins is thought to serve as a replication  
305 initiation site in cells with wild type rDNA (Brewer and Fangman, 1988; Linskens and  
306 Huberman, 1988). By this estimate, a strain with 180 rDNA copies would have ~36 active  
307 origins in the rDNA locus—close to the maximum number of possible rDNA origin initiations in  
308 the minimal rDNA strains. We wondered how many rDNA origins fire in early S phase in the  
309 minimal rDNA strain and if increased early rDNA firing would suffice to alter replication timing  
310 genome-wide.

311           Digestion of replicating rDNA by the restriction enzyme NheI generates a variety of  
312 distinct molecular intermediates/structures such as “bubbles” from active initiation, passively  
313 replicated “Y” fragments, and “X” fragments produced by converging replication forks (Figure  
314 4A), all of which can be resolved by 2D gel electrophoresis and Southern blotting (Figure 4B)  
315 (Brewer and Fangman, 1988, 1987). However, accurate quantification of early rDNA initiation  
316 requires the presence of the ribonucleotide reductase inhibitor hydroxyurea (HU) to slow down  
317 fast-moving replication forks; these forks in *S. cerevisiae* travel at a rate of 1.5 kb per minute at  
318 30°C (Bell and Labib, 2016). Replication forks initiated at an rDNA origin will travel off the 4.7  
319 kb origin-containing fragment (Figure 4A) in under 2 minutes and may fuse with oncoming  
320 rDNA forks in ~3 minutes. We therefore released G1-synchronized cultures into S phase in the  
321 presence of HU, which allowed us to capture more replication intermediates and limit initiation  
322 events to early S phase (Alvino et al., 2007; Feng et al., 2006). In addition to the 4.7 kb rARS  
323 fragment from every rDNA repeat, the NheI digest also generates a 24.4 kb single-copy rARS  
324 fragment at the telomere proximal end of the rDNA array (Figure 4A-B). We used this single-  
325 copy rDNA fragment for normalization, allowing us to generate a “per cell” estimate of active  
326 rARS initiation in early S phase.

327           Compared to the wild type rDNA strain, the minimal rDNA strain showed a far stronger  
328 rDNA bubble arc signal, which represents active replication initiations during S phase in HU  
329 (Figure 4C, S5C). At the 30 minute time point, we estimate that the minimal rDNA strain had  
330 9.1 rDNA initiations per cell whereas the wild type rDNA strain had less than one (Figure 4D).  
331 This quantification is likely an underestimate due to the movement of replication forks off the

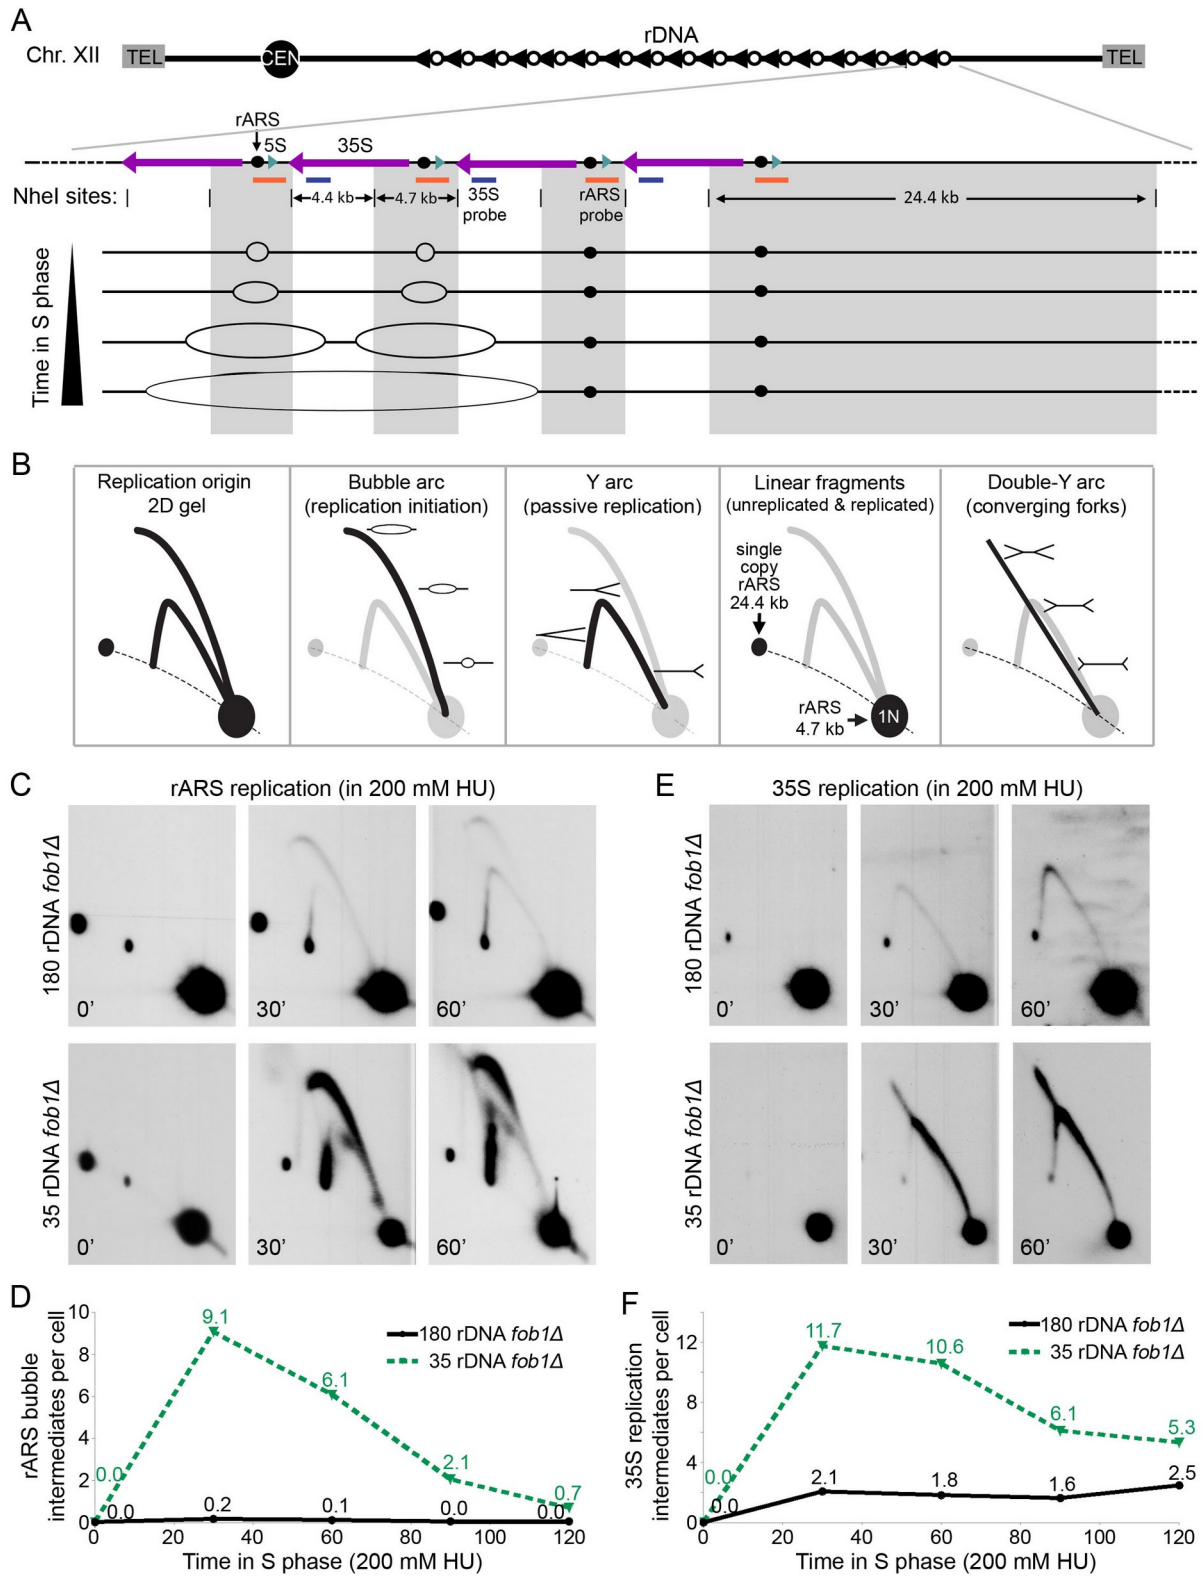

**Figure 4: rDNA copy number reduction drives a 10-fold increase in rDNA replication initiation during early S phase.**

332  
333

334 **Figure 4: rDNA copy number reduction drives a 10-fold increase in rDNA replication initiation**  
335 **during early S phase.** (A) Schematic of rDNA locus organization, relevant NheI-digest fragments,  
336 Southern blot probe locations, and replication intermediates predicted throughout S phase. The 24.4 kb  
337 fragment on the telomere proximal edge of the rDNA array serves as an internal reference for  
338 quantification as it is present in a single copy per cell and hybridizes to the rARS probe. (B)  
339 Representation of different replication intermediates on a 2D gel. (C,E) Timed 2D gels of cells released  
340 into S phase in the presence of 200 mM HU. 2D gels were probed with both (C) the rARS probe  
341 fragment and then (E) the 35S probe. Converging replication fork intermediates indicate initiation from  
342 adjacent rDNA repeats and are seen in the strain with 35 rDNA copies but not the strain with 180 rDNA  
343 copies. (D) Replication bubbles created by rARS initiations were quantified and normalized to the signal  
344 in the single copy 24.4 kb linear spot. (F) Estimation of replication fork intermediates present in the  
345 4.4kb NheI fragment without the rARS. Total replication fork signal was normalized to the 4.4 kb 1N  
346 spot and adjusted for rDNA copy number.

347

348 rARS-containing fragment (Figure 4A). Passively replicating Y-arc and convergent double-Y  
349 intermediates (Figure 4B) seen in the adjacent non-origin 35S fragment (Figure 4E, S5D)  
350 represent replication forks that have traveled from a neighboring rDNA origin. Quantification of  
351 these Y and double-Y fragments relative to the linear 1N spot (Figure 4B) indicate that the wild  
352 type rDNA array had an additional 2 initiation events per cell while the minimal rDNA array had  
353 an additional 11 (Figure 4F). Combining active and passive replication values, we estimate that  
354 the wild type strain contains 2 active rDNA origins in early S phase while the minimal rDNA  
355 strain contains 20. Since the earliest replicating origin subset across the *S. cerevisiae* genome is  
356 only 60 origins in a population of cells (Alvino et al., 2007; Yabuki et al., 2002), 18 additional  
357 early-replicating rDNA origins in a single cell could easily generate significant competition for  
358 limiting replication factors or nucleotides in early S phase (Mantiero et al., 2011; Shyian et al.,  
359 2016) and cause the observed genome replication delays.

360

361 **The increased DNA damage sensitivity in strains with reduced rDNA arises from a synthetic**  
362 **interaction with *fob1Δ***

363 The genome replication delays in the minimal rDNA strain might contribute to the  
364 strain's increased sensitivity to DNA damage; however, a previous study reported that the  
365 additional, untranscribed rDNA copies protect cells from DNA damage by facilitating  
366 recombinational repair (Ide 2010). We sought to disentangle the effects of early rDNA

367 replication and DNA repair on DNA damage sensitivity in the minimal rDNA strain by  
368 considering two other mutants that replicate rDNA early: *rif1Δ* and *sir2Δ* (Figure 5).

369 Rif1p inhibits local replication initiation by recruiting protein phosphatase 1 (PP1,  
370 Glc7p), which prevents the premature activation of the replication helicase subunit Mcm4p  
371 (Davé et al., 2014, p. 1; Hiraga et al., 2014; Mattarocci et al., 2014). Because Rif1p binds at the  
372 rARS (Hafner et al., 2018; Shyian et al., 2016), wild type rDNA arrays replicate early in Rif1p's  
373 absence. Sir2p is a histone deacetylase responsible for silencing rDNA repeats. Without Sir2p,  
374 reduced nucleosome occupancy and increased transcription at active rDNA repeats facilitate the  
375 translocation of MCM helicases away from repressive chromatin environments (Foss et al.,  
376 2019), likely generated by rARS-bound Rif1p. These unregulated MCM helicases drive early  
377 replication initiation at the wild type-length rDNA arrays in *sir2Δ* mutants (Foss et al., 2017;  
378 Saka et al., 2013; Yoshida et al., 2014). The minimal rDNA strain shares a critical feature with a  
379 *sir2Δ* mutant: its rDNA array is also euchromatic and highly transcribed (French et al., 2003; Ide  
380 et al., 2010), likely allowing loaded MCM helicases to translocate away from the rARS-bound  
381 Rif1p.

382 Although the rDNA shifts to early replication in all three backgrounds – minimal rDNA,  
383 *sir2Δ*, and *rif1Δ* – *sir2Δ* mutants did not show increased DNA damage (Figure 6B). This finding  
384 seemed to exclude genome replication defects as a sole source of DNA damage sensitivity  
385 because these defects were reported to be more severe in *sir2Δ* mutants than in strains with  
386 reduced rDNA arrays (Foss et al., 2017; Yoshida et al., 2014). We first confirmed that loss of  
387 *SIR2* results in early replicating rDNA (Figure 6C), although we observed no obvious increase in  
388 cumulative rDNA origin initiation across S phase (Figure 6D). Second, as a proxy for plasmid  
389 maintenance, we examined abundance of the 2 micron plasmid, whose numbers decrease in the  
390 presence of replication defects (Maiti and Sinha, 1992; Storici et al., 1995). Both strains with  
391 early replicating rDNA (*sir2Δ* and minimal rDNA) showed reduced 2 micron plasmid  
392 abundance, to approximately 50% of the levels in wild type control strains (Figure 6E).

393 Because Sir2p plays a role in restricting genome-wide DNA replication (Hoggard et al.,  
394 2020, 2018), we wondered if deletion of *SIR2* could rescue the minimal rDNA strain's sensitivity  
395 to DNA damage and replication stress. We therefore examined MMS sensitivity upon *sir2Δ*



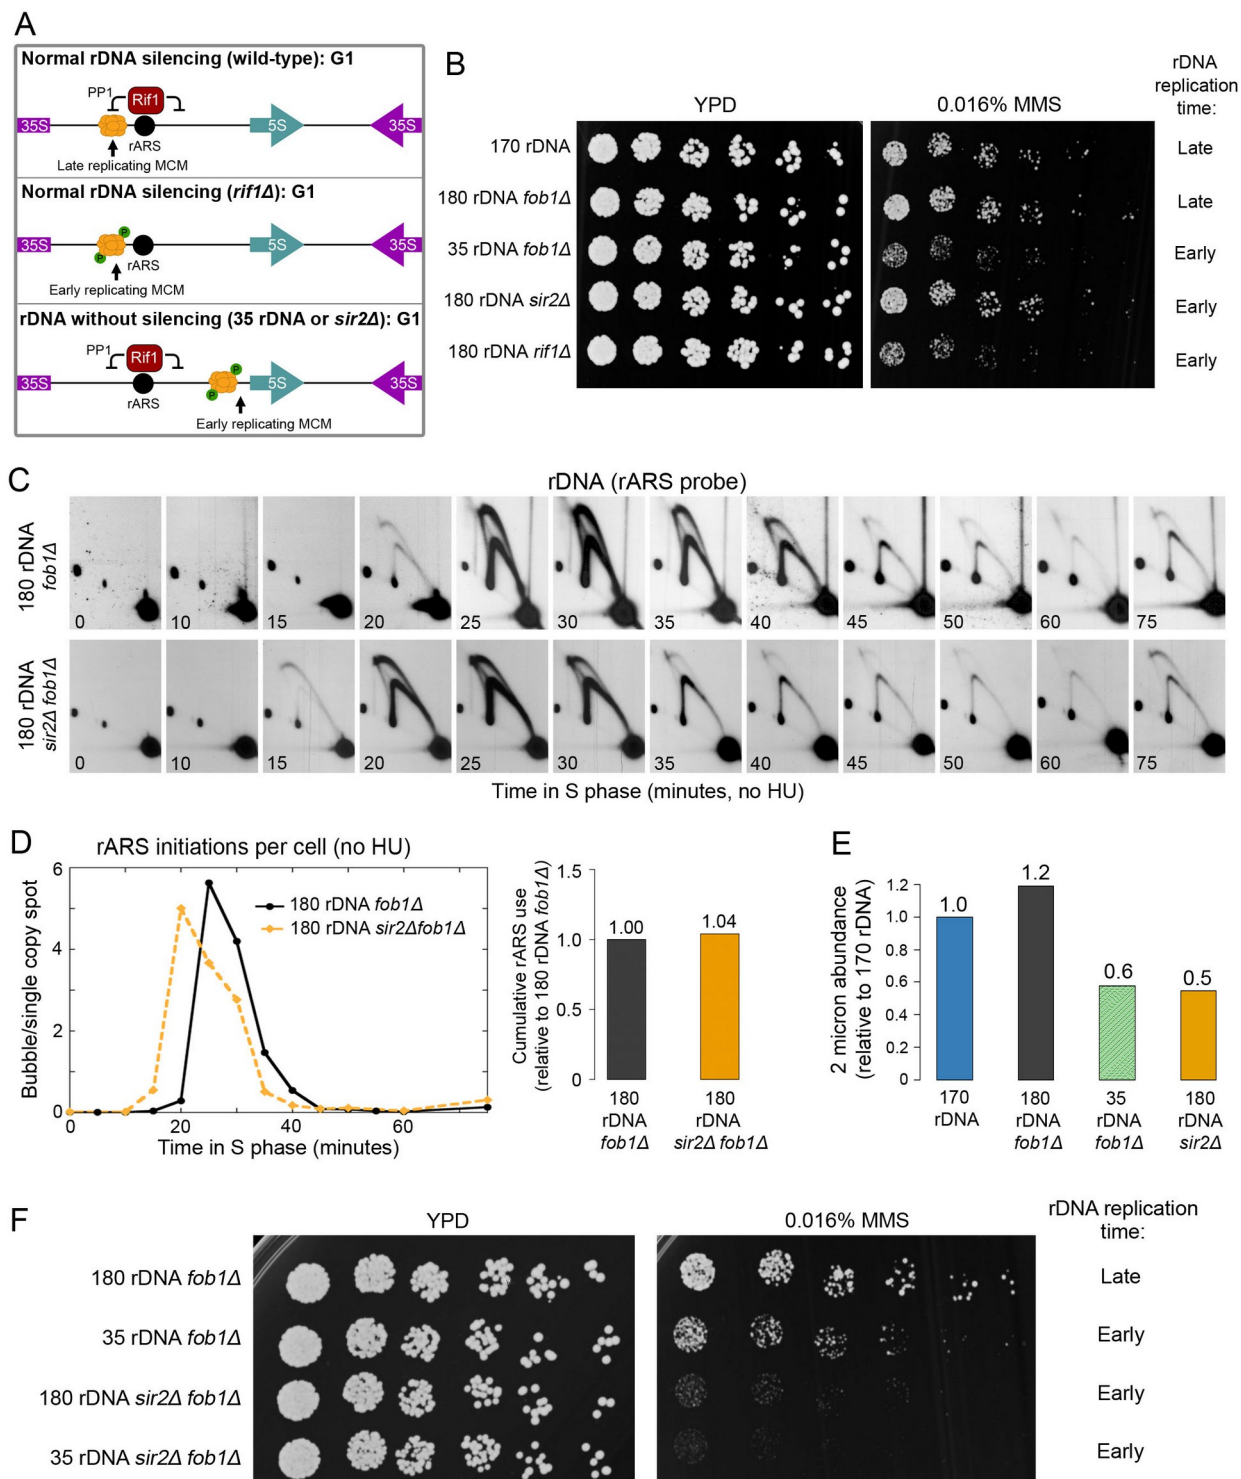

396 **Figure 5: Sensitivity to MMS is due to a synthetic interaction between Fob1p and early**  
 397 **rDNA replication.**

398 **Figure 5: Sensitivity to MMS is due to a synthetic interaction between Fob1p and early rDNA**  
399 **replication.** (A) Proposed mechanisms leading to early replicating rDNA. (B) The 35 rDNA *fob1Δ* strain  
400 displays increased sensitivity to 0.016% MMS whereas the *sir2Δ* strain and *fob1Δ* strain show wild type  
401 sensitivity. (C) Timed 2D gels of rDNA replication initiation in a 170 rDNA *sir2Δ fob1Δ* strain. (D)  
402 Quantification of rDNA initiation signal per cell (relative to the 24.4 kb single copy rDNA spot) over the  
403 course of S phase for 180 rDNA *fob1Δ*, 35 rDNA *fob1Δ*, and 180 rDNA *sir2Δ fob1Δ* strains. (E)  
404 Abundance of the 2 micron plasmid, a parasitic element partially dependent on the *S. cerevisiae*  
405 replication machinery, was assessed in logarithmically growing cells using quantitative Southern blotting  
406 and normalized to a single copy genomic probe (ChrXV:810). (F) Deletion of *FOB1* increases MMS  
407 sensitivity of strains with early replicating rDNA.

408

---

409 deletion in the minimal rDNA strain and the wild type rDNA strain. To our surprise, deletion of  
410 *SIR2* in a *fob1Δ* background led to increased MMS sensitivity regardless of rDNA copy number  
411 (Figure 6F). This *fob1Δ* -dependent MMS sensitivity was reproducible among multiple strain  
412 isolates, each of which was assessed for rDNA copy number (Figure S6A-B), confirming a  
413 synthetic defect in DNA damage sensitivity between *fob1Δ* and *sir2Δ*.

414 Although the rDNA shifts to early replication in all three backgrounds – minimal rDNA,  
415 *sir2Δ*, and *rif1Δ – sir2Δ* mutants did not show increased DNA damage (Figure 5B). This finding  
416 seemed to exclude genome replication defects as a source of DNA damage sensitivity because  
417 these defects were reported to be more severe in *sir2Δ* mutants than in strains with reduced  
418 rDNA arrays (Foss et al., 2017; Yoshida et al., 2014). We first confirmed that loss of *SIR2*  
419 results in early replicating rDNA (Figure 5C), although we observed no obvious increase in  
420 cumulative rDNA origin initiation across S phase (Figure 5D). Second, as a proxy for plasmid  
421 maintenance, we examined abundance of the 2 micron plasmid, whose numbers decrease in the  
422 presence of replication defects (Maiti and Sinha, 1992; Storici et al., 1995). Both strains with  
423 early replicating rDNA (*sir2Δ* and minimal rDNA) showed reduced 2 micron plasmid  
424 abundance, to approximately 50% of the levels in wild type control strains (Figure 5E).

425 Because Sir2p plays a role in restricting genome-wide DNA replication (Hoggard et al.,  
426 2020, 2018), we wondered if deletion of *SIR2* could rescue the minimal rDNA strain's sensitivity  
427 to DNA damage and replication stress. We therefore examined MMS sensitivity upon *sir2Δ*  
428 deletion in the minimal rDNA strain and the wild type rDNA strain. To our surprise, deletion of  
429 *SIR2* in a *fob1Δ* background led to increased MMS sensitivity regardless of rDNA copy number  
430 (Figure 5F). This *fob1Δ* -dependent MMS sensitivity was reproducible among multiple strain

431 isolates, each of which was assessed for rDNA copy number (Figure S6A-B), confirming a  
432 synthetic defect in DNA damage sensitivity between *fob1Δ* and *sir2Δ*.

433 We considered that *fob1Δ* might drive sensitivity of strains with early rDNA replication  
434 to DNA damage/replication stress. The *fob1Δ* mutation is required to prevent expansion of  
435 reduced rDNA arrays (Kobayashi et al., 1998), making it challenging to assess the consequences  
436 of the minimal rDNA array in a wild type background. However, we hoped that the rDNA  
437 expansion after *FOBI* restoration might be slow enough to capture and assess DNA damage  
438 sensitivity of a short rDNA array. To this end, we examined spores from a cross of the minimal  
439 rDNA strain (35 rDNA copies; *fob1Δ*) strain with a *MATα* 150 rDNA *FOBI* strain. Each spore  
440 was allowed to form a colony, which was immediately inoculated into culture, and both rDNA  
441 copy number and MMS sensitivity were assessed from the same culture. The isolated *FOBI* and  
442 *fob1Δ* cells with short rDNA had approximately 55 rDNA copies when plated on MMS (Figure  
443 S6C). As suitable controls, we employed the previously engineered *fob1Δ* strains with 55 and 80  
444 rDNA copies, with the former exhibiting greater sensitivity to MMS than the latter. The *FOBI*  
445 cells with 55 rDNA copies were more resistant to MMS than *fob1Δ* cells with 55 rDNA copies or  
446 minimal rDNA; there was no discernible difference between *FOBI* and *fob1Δ* cells with 150  
447 rDNA copies (Figure S6D). Thus, it is the loss of *FOBI* in combination with rDNA reduction  
448 and/or early rDNA replication that causes sensitivity to DNA damage. We therefore propose that  
449 the presence of Fob1p itself plays a significant role in the mitigation of early rDNA replication  
450 effects, outside of the genome replication delays we observed and the previously reported DNA  
451 damage sensitivity (Ide et al., 2010).

452  
453 The mitotic exit regulator Cdc14 is mislocalized in the minimal rDNA strain

454 The replication fork-block protein Fob1p has other roles in addition to its eponymous  
455 FOrk-Blocking activity (Krawczyk et al., 2014; Salim et al., 2021; Ward et al., 2000), including  
456 sequestration of the mitotic-exit phosphatase Cdc14p (Huang and Moazed, 2003; Stegmeier et  
457 al., 2004). We focused on Cdc14p sequestration since delayed genome replication could alter  
458 mitotic exit. Cdc14p is recruited to two regions of the rDNA: at the Replication Fork Barrier  
459 (RFB) where it is bound to Fob1p and upstream of the 35S transcription start site where it is

460 bound by a yet unidentified factor (Figure S7A; Huang et al., 2006; Huang and Moazed, 2003;  
461 Stegmeier et al., 2004). Cdc14p is sequestered in the nucleolus until its release to the nucleus  
462 during early anaphase and to the cytoplasm during late anaphase and mitotic exit (Mohl et al.,  
463 2009; Shou et al., 1999; Stegmeier et al., 2004; Visintin et al., 1999).

464 We were curious to determine whether Cdc14p localization would be altered by rDNA  
465 copy number reduction in a *fob1Δ* mutant background. We examined localization of Cdc14p-  
466 GFP in comparison to DAPI-stained nuclei in both the minimal rDNA and wild type rDNA  
467 strains arrested in G1. Almost 90% of wild type rDNA cells showed Cdc14p-GFP normally  
468 sequestered to the nucleolus, which excludes DAPI (Figure 6A-B); the remaining cells with  
469 Cdc14p-GFP overlapping the DAPI-stained nucleus are likely a consequence of their nucleoli  
470 being above or below the nucleus during microscopy. In the minimal rDNA strain, a mere  
471 32.2% of G1 cells showed nucleolar Cdc14p-GFP, with 67.8% of cells showing diffuse nuclear  
472 Cdc14p-GFP.

473 This aberrant Cdc14p localization is not due to a loss of nucleolar integrity. We  
474 examined nucleolar structure in our strains using a GFP fusion of Utp13p, a nucleolar protein  
475 involved in ribosome biogenesis (Huh et al., 2003; Woolford and Baserga, 2013). Utp13p-GFP  
476 localization was identical in both the minimal rDNA and the wild type rDNA strains (Figure 6B-  
477 C), indicating that nucleolar structure was not altered, consistent with previous findings (Dauban  
478 et al., 2019). The minimal rDNA strain's aberrant Cdc14p-GFP localization is consistent with a  
479 mitotic exit defect that exacerbates effects from delayed genome replication.

480

#### 481 A redundant mitotic exit checkpoint in yeast?

482 If Cdc14p is involved in coordinating genome replication and mitotic exit, we would  
483 expect delayed anaphase entry to accommodate the genome replication defects in strains with  
484 early rDNA replication. Given the substantial delays in DNA replication and cyclin signaling,  
485 we anticipated late anaphase entry in all strains with early replicating rDNA: the 35 rDNA *fob1Δ*  
486 strain, and the *sir2Δ* and *rif1Δ* single mutants. We examined DAPI-stained nuclear morphology  
487 across S phase as a proxy for entry into anaphase ((Hartwell et al., 1974; Yellman and Roeder,

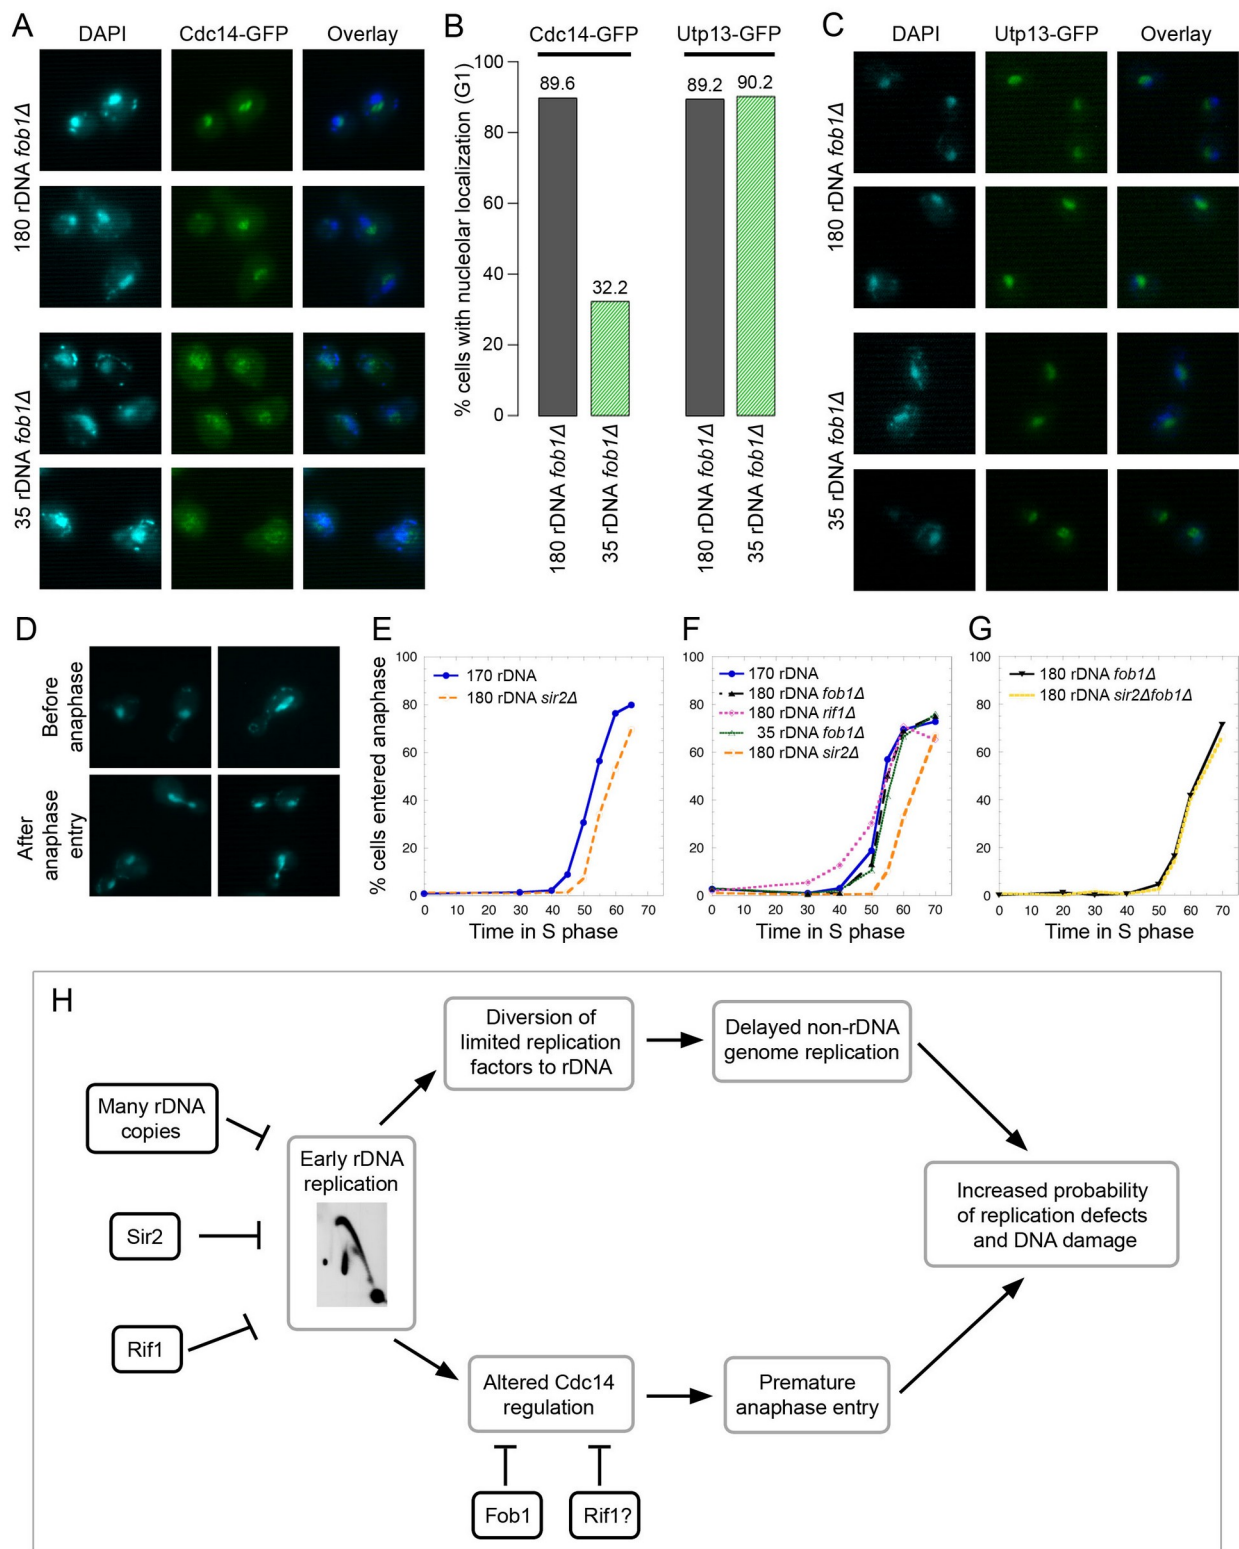

488  
489

**Figure 6: Minimal rDNA strains show poor nucleolar sequestration of Cdc14p and premature anaphase entry.**

490 **Figure 6: Minimal rDNA strains show poor nucleolar sequestration of Cdc14p and premature**  
491 **anaphase entry.** (A) C-terminally tagged Cdc14-GFP was visualized in 180 rDNA *fob1Δ* and 35 rDNA  
492 *fob1Δ* cells. (B) Quantification of G1 cells with nucleolar localization of Cdc14-GFP or Utp13-GFP. (C)  
493 Utp13-GFP, a nucleolar protein that is involved in rRNA processing, was used to ascertain nucleolar  
494 structure (Woolford and Baserga 2013). Both 35 rDNA *fob1Δ* and 180 rDNA *fob1Δ* cells show normal  
495 nucleolar structure. (D) Examples of DAPI-stained nuclei representing cells scored as either being  
496 “before anaphase” or “after anaphase entry.” (E-G) Quantification of percentage of cells that had entered  
497 anaphase for each strain over time. (H) Proposed model regarding consequences of rDNA copy number  
498 reduction and early rDNA replication.

499

---

500 2015), Figure 6D). As anticipated, the *sir2Δ* mutant entered anaphase later than the wild type  
501 (Figure 6E-F). However, both the minimal rDNA strain and the *rif1Δ* strain entered anaphase at  
502 the same time or earlier than their wild type control strains, suggesting that these mutants have  
503 lost the mechanism to delay anaphase in response to delayed genome replication (Figure 6F).  
504 The link between genome replication status and anaphase entry appears to be partially dependent  
505 on *FOBI*: no difference was observed in anaphase entry between *sir2Δ* and *SIR2* strains in the  
506 absence of *FOBI* (Figure 6G). The observed disconnect between S phase completion and  
507 anaphase entry mirrors our earlier results with the MMS sensitivity assay: the minimal rDNA,  
508 *rif1Δ* and *sir2Δ fob1Δ* strains showed anaphase progression in spite of replication delays as well  
509 as increased MMS sensitivity (Figure 5B, F). The *FOBI*-dependent coordination between  
510 anaphase entry and genome replication completion suggests that Fob1p acts as a redundant,  
511 yeast-specific checkpoint for S phase completion functioning in concert with Cdc14p  
512 sequestration (Figure S7).

513

## 514 **DISCUSSION:**

### 515 **Minimal rDNA arrays replicate early and delay genome replication**

516 Here, we characterized the replication consequences of reducing the *S. cerevisiae* rDNA  
517 locus from its wild type ~180 copies to a minimal array of 35 copies. We found altered  
518 replication timing not just at the rDNA locus but also across the genome. The minimal rDNA  
519 array replicates at the very earliest part of S-phase whereas the full-length rDNA is among the  
520 latest replicating regions. This shift in replication timing is explained by the ~20 additional

521 rDNA initiations that occur in the minimal rDNA array in early S phase. We propose that these  
522 additional early-replicating rDNA origins divert the limiting factors required to activate non-  
523 rDNA origins, thereby creating delays in replication elsewhere in the genome. Our findings  
524 contradict previous interpretations of similar data, whose authors concluded that rDNA copy  
525 number reduction leads to replication defects only at the rDNA locus and not in the rest of the  
526 genome (Ide et al., 2010). However, replication of other large chromosomes appears visibly  
527 impaired in their manuscript (Ide et al. 2010, Figure 2D), consistent with our findings and  
528 interpretation.

529         The dramatic shift of rDNA replication to the early part of S-phase in the minimal rDNA  
530 strains comes at a price: impaired plasmid maintenance, heightened sensitivity to HU and MMS,  
531 and delayed genome replication. It appears paradoxical that reducing rDNA copy number  
532 generates replication stress given that the full-length wild type rDNA array is dramatically  
533 shortened in many conditions of imposed replication stress, either in the presence of DNA  
534 replication mutants or limiting conditions like HU (Ide et al., 2007; Lynch et al., 2019; Salim et  
535 al., 2017; Sanchez et al., 2017). Indeed, rDNA copy number reduction has been proposed to be a  
536 compensatory mechanism for replication stress (Ide et al., 2007; Kwan et al., 2013; Salim et al.,  
537 2017). We argue that rDNA copy number reduction will affect genome replication only if the  
538 rDNA replication timing is affected. This argument is supported by earlier studies describing a  
539 mutant that induces replication stress and reduces rDNA copy number (Lynch et al., 2019). The  
540 reduced rDNA array in this mutant remained late-replicating, possibly because its copy number  
541 reduction was not severe enough to alter replication timing. Further work is necessary to  
542 determine the copy number reduction leading to early rDNA replication and whether this shift in  
543 replication time is gradual or precipitous.

544

545 A synthetic interaction between early rDNA replication and *FOBI* explains sensitivity to DNA  
546 damage in strains with reduced rDNA copy number

547         Early replicating rDNA causes genome replication defects (this study, (Foss et al., 2017;  
548 Ide et al., 2010; Shyian et al., 2016; Yoshida et al., 2014)), yet the increased DNA-damage  
549 sensitivity in strains with early-replicating rDNA is not solely a response to delayed genome-

550 wide replication. As we show, *sir2Δ* single mutants have early replicating rDNA with wild type  
551 copy number and suffer genome-wide replication defects (Foss et al., 2017) but this background  
552 is not sensitive to DNA damage. Comparing the *sir2Δ fob1Δ* and *sir2Δ* strains, we identified a  
553 synthetic interaction between *fob1Δ* and early rDNA replication, which results in increased  
554 sensitivity to the DNA-alkylating agent MMS.

555 Previous studies proposed that reduced rDNA copy number sensitizes strains to DNA  
556 damage because DNA repair is impaired in short arrays in which all copies are transcribed (Ide  
557 et al., 2010). This interpretation was based on the observation that a deletion of the PolII-subunit  
558 *RPA135*, and consequently cessation of endogenous rDNA transcription, erased the difference in  
559 MMS sensitivity between a 20-copy rDNA strain and a strain purportedly carrying 110 copies.  
560 However, deletions of rDNA transcription machinery, including *RPA135*, result in an 80%  
561 reduction in rDNA copy number (Brewer et al., 1992; Kobayashi et al., 1998). Thus, the  
562 similarity in MMS sensitivity between the two strains could simply stem from similarly low  
563 rDNA copy number, which was not verified in the study (Ide et al., 2010).

564 Moreover, the MMS-sensitive phenotype of the *sir2Δ fob1Δ* strain, which contains over  
565 150 rDNA copies, is inconsistent with the model proposed by Ide *et al.* This strain should have  
566 sufficient DNA repair capacity because loss of *SIR2* only moderately increases the number of  
567 accessible, presumably actively transcribed rDNA copies (*i.e.* 40% accessible vs 60% non-  
568 accessible in wild type yeast; 50% accessible vs 50% non-accessible in *sir2Δ*, (Smith and Boeke,  
569 1997)). However, in our hands, the *sir2Δ fob1Δ* strain shows possibly even greater MMS  
570 sensitivity than the minimal rDNA *fob1Δ* strain (Figure 6E). Taken together, our results  
571 demonstrate that the capacity for DNA damage repair provided by additional, silenced rDNA  
572 copies does not explain the sensitivity of reduced rDNA strains to DNA damage.

573

574 The synthetic interaction between early rDNA replication and *FOB1* uncovers a putative cell  
575 cycle checkpoint in yeast



576           Considering prior evidence and our findings, we propose a model explaining 1) how  
577 rDNA replication might coordinate whole genome replication and anaphase entry and 2) how  
578 Fob1p might function as a redundant checkpoint in Cdc14 sequestration and mitotic exit.

579           In a wild type yeast cell (Figure S7A), ~2000 Cdc14p molecules (Cherry et al., 2012; Ho  
580 et al., 2018; Kulak et al., 2014) are sequestered at two sites within an rDNA repeat: at the  
581 transcription start site (TSS) and the replication fork barrier (RFB) bound by Fob1p. Cdc14p  
582 remains bound at all 180 rDNA repeats during G1 and early S phase. In late S phase, 36 rDNA  
583 origins fire and replication forks begin to dislodge Cdc14p from the nearby TSS, but Cdc14p  
584 remains bound to Fob1p at the 180 RFB sites. Fob1p, which enforces unidirectional replication  
585 (Brewer and Fangman, 1988; Linskens and Huberman, 1988), acts as second, more stable tether  
586 for Cdc14p because the RFB can only be replicated by an oncoming fork from an adjacent active  
587 origin. Given that a 1 in 5 rDNA origins initiate in a wild type cell (Brewer and Fangman, 1988;  
588 Linskens and Huberman, 1988), the nearest active origin is ~45 kb (5 rDNA arrays) away on  
589 average, and it will take the replication machinery ~30 minutes to reach the stalled fork. Hence,  
590 rDNA will complete replication 30 minutes after rDNA origins fire in S phase, consistent with  
591 the rDNA locus as the very last region to complete replication. Thus, Cdc14p remains  
592 sequestered in the very last region of the genome to replicate, to be fully dislodged by replication  
593 at the very end of S phase. We posit that full replication of the rDNA signals the genome-wide  
594 replication completion and enables subsequent anaphase entry through Cdc14p release.

595           In a *fob1Δ* mutant with wild type rDNA copy number (Figure S7B), Cdc14p is not bound  
596 to the RFB, but remains associated with the rDNA TSS until rDNA replication completion in late  
597 S/early anaphase (Stegmeier et al., 2004). The wild type-length rDNA is still replicated in late S  
598 phase and the genome finishes replication by the time of complete Cdc14p release, maintaining  
599 coordination of both replication processes. The *fob1Δ* strain retains wild type sensitivity to DNA  
600 damage and replication stress agents.

601           In a *fob1Δ* mutant with minimal rDNA copy number (Figure S7C), Cdc14p nucleolar  
602 localization is severely disrupted even prior to S phase. The 35 rDNA copies do not provide  
603 enough binding sites for Cdc14p, in particular because Fob1p is missing at the RFB. The  
604 minimal rDNA array replicates early, which dislodges Cdc14p fully in early to mid S phase.

605 Free, unsequestered Cdc14p 1 will induce anaphase entry while the genome has not yet  
606 completed replication. This disconnect between completion of genome replication and anaphase  
607 entry may lead to premature cell cycle progression without allowing sufficient time for DNA  
608 repair, resulting in increased sensitivity to DNA damage and replication stress agents (Figure 2B,  
609 6A).

610 In a *sir2Δ* mutant with wild type rDNA copy number (Figure S7D), the rDNA replicates  
611 early while replication delays occur elsewhere. This strain shows wild type sensitivity to DNA  
612 damage (MMS, Figure 6A). The presence of Fob1p promotes the retention of Cdc14p at the  
613 RFB and also enforces slower, unidirectional rDNA replication. Although the rDNA array  
614 replicates early, it would still take ~30 minutes for rDNA replication to be complete. During this  
615 time, Cdc14p will remain bound to the RFB via Fob1p while the genome will complete  
616 replication, apparently even with rDNA-induced delays. In this way, anaphase entry remains  
617 coordinated with genome replication completion. Consistent with this interpretation, we  
618 observed delayed anaphase in *sir2Δ* single mutant strains, which suggest anaphase entry remains  
619 coordinated with genome replication.

620 In a *sir2Δ fob1Δ* mutant with wild type rDNA copy number (Figure S7E), Cdc14p is  
621 sufficiently bound to the rDNA array in G1, but is missing at RFBs because of the absence of  
622 Fob1p. Fob1p absence also leads to more rapid, bidirectional replication of the rDNA array,  
623 which is completed in 15 minutes in this strain. This early and rapid replication of the rDNA  
624 array will dislodge Cdc14p from the nucleolus while the rest of the genome is in the midst of  
625 replicating. Therefore, the *sir2Δ fob1Δ* strain loses coordination between completion of genome  
626 replication and anaphase entry, resulting in increased sensitivity to DNA damage (Figure 6E,  
627 7G).

628 Taken together, the evolutionarily conserved excess of rDNA copies in concert with their  
629 late replication act as checkpoint for whole genome replication via Cdc14p sequestration in the  
630 nucleolus. Cdc14p sequestration redundantly requires the presence of the yeast-specific Fob1p  
631 at RFBs.

632

633 rDNA copy number and genome replication: implications for disease

634 rDNA copy number can affect the essential processes of whole genome replication and  
635 cell cycle progression, extending the phenotypic impact of this genomic element far beyond  
636 ribosome biogenesis (Figure 7H). Although *S. cerevisiae* populations typically maintain strain-  
637 specific rDNA copy number (Kwan et al., 2016), the repetitive nature of rDNA arrays can allow  
638 for rare array contraction below the range of natural variation. Thus, rDNA copy number should  
639 be taken into consideration as a background variable when interpreting the consequences of  
640 other genetic variants. In fact, rDNA copy number changes are frequently observed after  
641 standard *S. cerevisiae* genetic manipulation practices (Kwan et al., 2016).

642 For metazoans, rDNA copy number reduction may have implications for health  
643 outcomes. A recent study reports that rDNA copy number reduction precedes pathogenesis in an  
644 mTOR-activated cancer mouse model, suggesting that rDNA reductions may act as driver  
645 mutations in certain cancers (Wang and Lemos, 2017; Xu et al., 2017). Hutchinson-Gilford  
646 progeroid cell lines show bloated nucleoli (Buchwalter and Hetzer, 2017) and increased DNA  
647 damage that appears late in S phase (Chojnowski et al., 2020), echoing phenotypes observed in  
648 yeast strains with early replicating rDNA. Although the replication fork barrier protein Fob1p  
649 itself is not conserved in metazoans, some Cdc14p homologs are known to localize to the  
650 nucleolus (Berdougo et al., 2008; Kaiser et al., 2004; Manzano-López and Monje-Casas, 2020;  
651 Saito et al., 2004; Wu et al., 2008). Cdc14p regulation in metazoans may be more sensitive to  
652 early rDNA replication without the redundant Fob1p tether.

653

654 How plausible is DNA replication as a gauge of whole genome replication status?

655 While the nucleolus was originally deemed an oddly mundane location for such an  
656 exciting molecule, Cdc14p sequestration in the nucleolus is now recognized as an important  
657 hallmark of cell cycle regulation (Amon, 2008). We argue that this mundane organelle, and  
658 Cdc14p's localization within in it, are ideal for cell cycle control. Every cell contains nucleoli,  
659 membrane-free organelles that form around the rDNA arrays. Nucleoli and rDNA transcription  
660 are highly responsive to cell and organismal physiology, including nutritional status, stress, and

661 aging. The rDNA is late-replicating and associated with Cdc14p whose release into the nucleus  
662 coincides with anaphase entry (Figure 7H). The late replication of the rDNA locus may be  
663 conserved across a wide variety of species in order to both mitigate replication competition and  
664 coordinate replication status with cell cycle progression.

665

#### 666 **Acknowledgements:**

667 This work was supported by the following funding sources: University of Washington Genome  
668 Training Grant T32HG000035 to KLL, NIGMS R35 GM122497 to BJB and MKR, NIGMS R01  
669 GM122088 to C.Q., and NIH grant RM1 HG010461 to C.Q. We are grateful to the Kaeberlein  
670 Lab for generously providing us with the Cdc14-GFP and Utp13-GFP strains used to generate  
671 strains for this paper. We would like to thank to Dr. Elizabeth Morton, Ashley Hall, Dr. Matthew  
672 Crane, Mitsuhiro Tsuchiya, and Benjamin Blue for lively rDNA club discussions, critiques, and  
673 moral support. We greatly appreciate Dr. Kerry Bubb for her statistics expertise and help with  
674 linear regression. We would also like to extend thanks for the western blotting advice given by  
675 Kate Sitko, Barbara Taskinen, and Jason Stephany from the Fowler Lab.

676

#### 677 **Author contributions:**

678 Conceptualization, E.X.K., G.M.A., B.J.B., C.Q., and M.K.R.; Methodology, E.X.K., G.M.A.,  
679 B.J.B., and M.K.R.; Investigation, E.X.K., G.M.A., K.L.L., P.F.L., H.M.A., X.S.W., S.A.J.,  
680 J.C.S., M.A.M., M.C., S.B.L., and M.N.; Resources, E.X.K., G.M.A., B.J.B., and M.K.R.;  
681 Writing - Original Draft, E.X.K., G.M.A., B.J.B., C.Q., and M.K.R.; Writing - Review & Editing,  
682 E.X.K., G.M.A., K.L.L., B.J.B., C.Q., and M.K.R.; Supervision: B.J.B., J.T.C., C.Q., and  
683 M.K.R.; Funding Acquisition, B.J.B., M.K.R., and C.Q.

684

#### 685 **Declaration of interests:**

686 The authors declare no competing interests.

687

688 **MATERIALS AND METHODS:**

689 Yeast strains, probe fragments, plasmids, and media:

690 Yeast strains used are listed in Supplementary Table 1. Yeast strains were grown, unless noted  
691 otherwise, in synthetic complete media buffered with 1% succinic acid (per liter: 1.45g yeast  
692 nitrogen base, 20 g glucose, 10 g succinic acid, 6 g NaOH, 5 g (NH<sub>4</sub>)<sub>2</sub>SO<sub>4</sub>, 2.8 g amino acid  
693 powder mix with pH adjusted to 5.8). In cases when YPD medium is used, per liter: 20 g bacto  
694 peptone, 10 g yeast extract, and 20 g glucose.

695 Since we were concerned about possible *de novo* rDNA copy number changes over the  
696 course of this study, we froze multiple samples from log-phase cultures that had been CHEF gel  
697 verified (Figure 1B), and used these frozen stocks as inoculants for each experiment.

698

699 rDNA reduction:

700 S288c *foi1Δ* strains transformed with the pRDN1-Hyg plasmid, were first isolated by selection  
701 for uracil prototrophy, then plated onto medium containing hygromycin B to select for rDNA  
702 copy number reduction (Chernoff et al., 1994; Kobayashi et al., 2001; Kwan et al., 2013).  
703 Individual colonies were picked for screening by CHEF gel electrophoresis to measure rDNA  
704 copy number (Figure S1). We identified and isolated strains with 35, 45, and 55 copies of rDNA  
705 and decided to focus on strains with 35 rDNA copies (“35 rDNA *foi1Δ*” and “35 rDNA<sup>RM</sup>  
706 *foi1Δ*”), restoring endogenous *URA3* to facilitate downstream replication assays. Genetic  
707 crosses were used generate prototrophic strains and GFP-tagged strains.

708

709 During the isolation of strains with reduced rDNA copy number by this pRDN1-HYG plasmid  
710 method, we noticed that 20-25% of the isolates with rDNA reductions had either diploidized or  
711 tetraploidized (Figure S1), something we had not previously observed when constructing strains  
712 by transformation. Subsequently, we verified ploidy of each strain for each experiment by flow  
713 cytometry and used only confirmed haploid strains for each experiment. This frequent increase  
714 in ploidy may be related to rDNA reduction by this pRDN1-Hyg method. While interesting, we

715 have not identified the biological mechanism involved and strongly suggest verifying ploidy  
716 when this rDNA reduction method is employed in the future.

717

#### 718 Preparation of DNA in agarose plugs:

719 DNA was isolated in agarose plugs according to previously published protocols (Tsuchiyama et  
720 al., 2013). Each 90  $\mu$ L plug contained either  $\sim 10^8$  stationary phase cells for CHEF gels,  $\sim 5 \times 10^7$   
721 log phase cells for rDNA 2D gels, or  $\sim 10^8$  log phase cells for single-copy origin 2D gels.  
722 Collected cells were washed with 50 mM EDTA, resuspended in 90  $\mu$ L 0.5% SeaPlaque GTG  
723 agarose in 50 mM EDTA, and transferred into plug molds. Once solidified, plugs were  
724 incubated in 1 mL spheroplasting solution (1 M sorbitol, 20 mM EDTA, 10 mM Tris-HCl pH7.5,  
725 14 mM  $\beta$ -mercaptoethanol, 0.5 mg/mL Zymolyase-20T (Amsbio)) for 2-5 hours at 37°C. Plugs  
726 were washed once with LDS (1 % lithium dodecyl sulfate, 100 mM EDTA, 10 mM Tris-HCl pH  
727 8.0) and incubated overnight at 37°C in LDS overnight with gentle shaking. Plugs were then  
728 washed 3 x 30 minutes in 0.2X NDS (1X NDS pH 9.5: 0.5 M EDTA, 10 mM Tris base, 1%  
729 Sarkosyl) and 5 x 30 minutes in TE pH 8.0. Processed plugs were stored at 4°C in TE pH 8.0  
730 until use.

731

#### 732 CHEF gel analysis:

733 We used contour-clamped homogeneous electric field (CHEF) gel electrophoresis to resolve  
734 intact *S. cerevisiae* chromosomes. A slice of each genomic DNA agarose plug was embedded in  
735 a 0.8% agarose gel (0.5X TBE) and each gel contained one wildtype sample as reference. For  
736 most CHEF gels, we ran the samples in 2.3L of 0.5X TBE using a Bio-Rad CHEF-DR11  
737 electrophoresis cell at 100V for 66 hours (switch time = 300 to 900 seconds). The gels were  
738 then stained with ethidium bromide to visualize all chromosomes, including the rDNA-  
739 containing chromosome XII. To examine the size of the excised rDNA array, genomic DNA  
740 samples in plugs were digested with BamHI or FspI and then run on a 0.8% CHEF gel at 165 V  
741 for 64 hours (switch time = 47 to 170 seconds). Chromosome XII size and rDNA copy number

742 were further examined via Southern blotting. For size comparison, known standards (*H. wingei*  
743 and/or Yeast Ladder from New England BioLabs) were included in each CHEF gel run.

744

745 Sample collection for chromosome replication completion assay:

746 Cells were grown to mid-logarithmic phase ( $2.5 \times 10^6$  cell/mL), arrested in G1 with  $3 \mu\text{M}$   $\alpha$ -  
747 factor, and released into S phase (by the addition of 0.15 mg/mL Pronase (EMD Millipore)) in  
748 the presence of 0.008% MMS. Samples were collected every 20 minutes for CHEF gel  
749 electrophoresis and prepared as described above in agarose plugs for CHEF gel electrophoresis.  
750 The same Southern blot membrane was probed for all measured chromosomes except for the  
751 FspI-excised rDNA.

752

753 Southern blotting:

754 Each gel was transferred to a GeneScreen Hybridization membrane using standard Southern  
755 blotting protocols (Tsuchiyama et al., 2013). We then hybridized each sequence of interest using  
756 a  $^{32}\text{P}$ -labeled probe. The blots were exposed to X-ray film and to Bio-Rad Molecular Imaging  
757 FX phosphor screens for visualization and quantification of signal intensity. Phosphor screens  
758 were scanned using a Bio-Rad Personal Molecular Imaging scanner and analyzed using Bio-  
759 Rad's Quantity One software. Southern blots were often stripped and re-probed with a different  
760 sequence of interest (CHEF gel blots, 2D gel blots, density transfer blots). To strip a Southern  
761 blot, blots were subjected to two washes of 20 minutes each in 500 mL stripping buffer (0.1%  
762 SSC; 1% SDS) that had been heated to  $100^\circ\text{C}$ . Blot stripping efficacy was gauged by exposure  
763 and quantification of phosphor screens before the next probe hybridization.

764

765 rRNA quantification:

766 rRNA quantification was performed as described (Sanchez et al., 2017). Asynchronous  
767 logarithmic phase cells were collected and nucleic acids (RNA and DNA) were isolated using a  
768 "Smash & Grab" phenol:chloroform extraction protocol (Radford, 1991). The RNA northern

769 blot was hybridized to a <sup>32</sup>P-labeled probe for the 25S rRNA sequence. To assess loading  
770 normalization, the DNA Southern blot portion was hybridized to a <sup>32</sup>P-labeled probe for *ACT1*, a  
771 single copy gene. The rRNA and *ACT1* blots were separately exposed to S Bio-Rad phosphor  
772 screens and 25S rRNA and *ACT1* DNA intensity was quantified using a Bio-Rad Personal  
773 Molecular Imager and Bio-Rad Quantity One software.

774

#### 775 Density transfer:

776 The density transfer protocol was adapted from (Alvino et al., 2007) Dense medium  
777 composition was 0.5% <sup>13</sup>C-labeled glucose, 0.5% <sup>15</sup>(NH<sub>4</sub>)<sub>2</sub>SO<sub>4</sub>, 0.00145% yeast nitrogen base  
778 (YNB), and 1% succinic acid (isotopically-light medium was the same composition with normal  
779 glucose and (NH<sub>4</sub>)<sub>2</sub>SO<sub>4</sub>). Cells were cultured in logarithmic phase for at least 10 generations in  
780 dense medium with the growth rate assessed for abnormalities. To collect synchronous S-phase  
781 cell samples, cultures of ~2.5 x 10<sup>8</sup> cell/mL were arrested with 3 μM α-factor for 1.25 population  
782 doublings (approximately 2 hours). Once the cell culture achieved >95% G1 arrest, cells were  
783 collected and washed 3 times with isotopically light medium containing α-factor. Cells were  
784 resuspended in the original volume of isotopically light medium containing 3 μM α-factor and a  
785 100 mL G1 sample was taken for flow cytometry and DNA analysis. Cells were released from  
786 G1 into S phase by the addition of 0.15 mg/mL Pronase (EMD Millipore). 100 mL samples  
787 were collected and immediately transferred into vessels containing frozen pellets of 40 mL of  
788 0.1% sodium azide in 0.2 M EDTA. The entire set of timed samples was collected before  
789 pelleting cells, taking a small aliquot for flow cytometry, and transferring the rest of the dry  
790 pellet to -20°C for storage until DNA isolation. DNA was extracted using a phenol:chloroform  
791 “Smash & Grab” protocol (see above) with an additional chloroform cleanup. Isolated DNA  
792 was digested overnight with EcoRI and then centrifuged in CsCl to separate replicated from  
793 unreplicated DNA. Cesium chloride gradients were drip-fractionated and the collected samples  
794 were analyzed using slot blots and hybridization to microarrays.

795

#### 796 Flow cytometry:



797 Cells for flow cytometry were fixed in 70% ethanol before processing for flow cytometry. Fixed  
798 cells were washed with 50 mM sodium citrate, sonicated, and resuspended in 500  $\mu$ L 50 mM  
799 sodium citrate. RNase A was added to a concentration of 2.5 mg/mL and the samples were  
800 incubated for 1 hour at 50°C. Proteinase K (50  $\mu$ L of 20 mg/mL) was then added and cells were  
801 incubated another hour at 50°C before staining with 1X Sytox Green. Cells were analyzed on a  
802 BD Canto II flow cytometer and flow cytometry data was analyzed using FlowJo software.

803

#### 804 2D gel electrophoresis:

805 Cells from the 180 rDNA *fob1 $\Delta$*  strain, the 35 rDNA *fob1 $\Delta$*  strain, and the 180 rDNA *sir2 $\Delta$  fob1 $\Delta$*   
806 strain were grown in logarithmic phase to a culture density of  $\sim 2.5 \times 10^6$  cells/mL. Cultures  
807 were then arrested in  $\alpha$ -factor for 1.25 doublings before being released into S phase by addition  
808 of Pronase (0.15 mg/mL). Samples were collected every 5 minutes: 100 mL for analysis of  
809 single-copy genomic origins or 30 mL for analysis of rDNA origins. Collection vessels  
810 contained frozen pellets of 0.1% sodium azide in 0.2 M EDTA to halt growth. Cells were  
811 washed once with 50 mM EDTA, a small sample taken for flow cytometry, and the remaining  
812 dry cell pellets were stored at -20°C until preparation for 2D gel electrophoresis. To extract  
813 DNA for 2D gels, cells were embedded in three 90  $\mu$ L 0.5% SeaPlaque agarose plugs and  
814 prepared as CHEF gel plugs. For each 2D gel, each plug was washed 3 x 20 minutes in the  
815 appropriate restriction buffer with 1X BSA (100  $\mu$ g/mL). The solution was then removed and  
816 the DNA was digested for 5 hours by addition of 3  $\mu$ L restriction enzyme directly onto each  
817 plug, and then subjected to standard 2D gel electrophoresis methods (Brewer and Fangman,  
818 1987), Southern blotted and hybridized for the sequence of interest. Cumulative origin initiation  
819 was estimated by integrating the area under the curve generated from plotting “rDNA initiations  
820 per cell” across time.

821

822 For 2D gels of cells in hydroxyurea (HU), 20 mL of the culture was transferred to another flask  
823 for the “no HU” control to check that cells would have had normal release into S phase.  
824 Hydroxyurea was added to the remaining culture to a final concentration of 200 mM and 10

825 minutes later, 0.15 mg/mL Pronase was added to both cultures to release the cells into S phase.  
826 Samples were collected every 30 minutes and prepared as above.

827

828 Plasmid maintenance assay:

829 Cells that contained *ARSI* plasmids (Kwan *et al.* 2013) were grown to logarithmic phase in  
830 selective medium (YPD + 200 µg/mL G418) and then released into non-selective medium  
831 (YPD) for the plasmid maintenance assay. Cells were kept in logarithmic phase growth and  
832 samples were collected approximately every 4 hours over the course of 48 hours. The growth  
833 rate was monitored to ascertain the number of generations/divisions between samples. DNA was  
834 extracted from cells using the “Smash & grab” protocol, digested with XmnI, and run on an  
835 agarose gel to resolve the 5.4 kb plasmid *ARSI* fragment from the 3.4 kb genomic *ARSI*  
836 fragment (used as a “per cell” loading control). The gel was then Southern blotted and the  
837 membrane hybridized to a <sup>32</sup>P-labeled *ARSI* fragment. *ARSI* plasmid abundance was assessed  
838 through Southern blotting and normalized to the endogenous *ARSI* locus. We quantified the  
839 amount of signal from plasmid *ARSI* and genomic *ARSI* for each sample and generated a  
840 plasmid maintenance curve for each strain, from which we were able to calculate the rate of  
841 plasmid loss per generation and estimate significance using linear regression.

842

843 Spot assays:

844 Cells were grown to log-phase, diluted in sterile water in 3-fold dilutions, and 2.5 µL was  
845 spotted onto YPD plates containing either no drug (control), 0.016% methyl methanesulfonate  
846 (MMS), or 200 mM hydroxyurea (HU). Plates were scanned after 40-48 hours of growth at  
847 30°C.

848

849 Cycloheximide sensitivity assay:

850 Cells were grown to log phase, upon which 3 x 10<sup>4</sup> log-phase cells were transferred to each well  
851 in a 96-well plate containing 150 µL medium per well and the appropriate concentration of

852 cycloheximide (0-200 ng/mL). Each condition was performed in triplicate and optical densities  
853 were measured at 30°C for 48 hours using a Bio-Tek reader. The maximum log-phase growth  
854 rate was manually calculated for each well.

855

#### 856 Western blotting:

857 Cells were grown in log phase to  $\sim 2.5 \times 10^8$  cell/mL before  $\alpha$ -factor arrest and release. For each  
858 strain, 1.5 mL was collected for protein extraction and 1 mL was collected for flow cytometry.  
859 Collected cell pellets were resuspended in 200  $\mu$ L SUMEB buffer (1% SDS, 8 M urea, 10 mM  
860 MOPS pH 6.8, 10 mM EDTA, 0.01% bromophenol blue) supplemented with protease inhibitors  
861 and 5%  $\beta$ -mercaptoethanol. Glass beads ( $\sim 100 \mu$ L 0.5 mm acid-washed) were added and cells  
862 were vortexed for 3 minutes. Lysates were incubated at 65°C for 10 minutes with intermittent  
863 shaking and then centrifuged for 5 minutes at 4°C at 20,000 x g. The clarified supernatant was  
864 transferred to a new tube and protein concentration was assessed using a Qubit (Thermo Fisher).  
865 For each sample, 15  $\mu$ g of protein was run on a Novex Tris-acetate SDS-PAGE gel and  
866 transferred to a nitrocellulose membrane for immunoblotting. HRP-conjugated antibodies  
867 against HA (Sigma Aldrich #12013819001) and Pgk1 (Abcam #ab197960) were used in this  
868 work.

869

#### 870 Microscopy:

871 Cells were fixed according the protocol described on the Koshland lab web site  
872 (<http://mcb.berkeley.edu/labs/koshland/Protocols/MICROSCOPY/gfpfix.html>): collected cell  
873 pellets were resuspended in paraformaldehyde solution (4% paraformaldehyde, 3.4% sucrose)  
874 and incubated at room temperature for 15 minutes. Cells were then washed once with  
875  $\text{KPO}_4$ /sorbitol solution and resuspended in 50  $\mu$ L  $\text{KPO}_4$ /sorbitol solution (0.1 M  $\text{KPO}_4$  pH 7.5,  
876 1.2 M sorbitol) and stored at 4°C until visualization. Before fluorescence microscopy, cells were  
877 sonicated and incubated with 0.5  $\mu$ g/ml DAPI for at least an hour.

878

879

880 **REFERENCES:**

881

- Abovich, N., Gritz, L., Tung, L., 1985. Effect of RP51 Gene Dosage Alterations on Ribosome Synthesis in *Saccharomyces cerevisiae*. *MOL CELL BIOL* 5, 7.
- Aldrich, J.C., Maggert, K.A., 2015. Transgenerational inheritance of diet-induced genome rearrangements in *Drosophila*. *PLoS Genet.* 11, e1005148. <https://doi.org/10.1371/journal.pgen.1005148>
- Alvino, G.M., Collingwood, D., Murphy, J.M., Delrow, J., Brewer, B.J., Raghuraman, M.K., 2007. Replication in hydroxyurea: it's a matter of time. *Mol. Cell. Biol.* 27, 6396–6406. <https://doi.org/10.1128/MCB.00719-07>
- Amon, A., 2008. A decade of Cdc14--a personal perspective. Delivered on 9 July 2007 at the 32nd FEBS Congress in Vienna, Austria. *FEBS J.* 275, 5774–5784. <https://doi.org/10.1111/j.1742-4658.2008.06693.x>
- Barberis, M., Linke, C., Adrover, M.À., González-Novo, A., Lehrach, H., Krobitsch, S., Posas, F., Klipp, E., 2012. Sic1 plays a role in timing and oscillatory behaviour of B-type cyclins. *Biotechnol. Adv.* 30, 108–130. <https://doi.org/10.1016/j.biotechadv.2011.09.004>
- Bell, S.P., Labib, K., 2016. Chromosome Duplication in *Saccharomyces cerevisiae*. *Genetics* 203, 1027–1067. <https://doi.org/10.1534/genetics.115.186452>
- Bénard, M., Lagnel, C., Pierron, G., 1995. Site-specific initiation of DNA replication within the non-transcribed spacer of *Physarum* rDNA. *Nucleic Acids Res.* 23, 1447–1453. <https://doi.org/10.1093/nar/23.9.1447>
- Berdougo, E., Nachury, M.V., Jackson, P.K., Jallepalli, P.V., 2008. The nucleolar phosphatase Cdc14B is dispensable for chromosome segregation and mitotic exit in human cells. *Cell Cycle Georget. Tex* 7, 1184–1190. <https://doi.org/10.4161/cc.7.9.5792>
- Bloom, J., Cross, F.R., 2007. Novel role for Cdc14 sequestration: Cdc14 dephosphorylates factors that promote DNA replication. *Mol. Cell. Biol.* 27, 842–853. <https://doi.org/10.1128/MCB.01069-06>
- Breitkreutz, A., Choi, H., Sharom, J.R., Boucher, L., Neduva, V., Larsen, B., Lin, Z.-Y., Breitkreutz, B.-J., Stark, C., Liu, G., Ahn, J., Dewar-Darch, D., Reguly, T., Tang, X., Almeida, R., Qin, Z.S., Pawson, T., Gingras, A.-C., Nesvizhskii, A.I., Tyers, M., 2010. A global protein kinase and phosphatase interaction network in yeast. *Science* 328, 1043–1046. <https://doi.org/10.1126/science.1176495>
- Brewer, B.J., Fangman, W.L., 1994. Initiation preference at a yeast origin of replication. *Proc. Natl. Acad. Sci. U. S. A.* 91, 3418–3422. <https://doi.org/10.1073/pnas.91.8.3418>

- Brewer, B.J., Fangman, W.L., 1988. A replication fork barrier at the 3' end of yeast ribosomal RNA genes. *Cell* 55, 637–643. [https://doi.org/10.1016/0092-8674\(88\)90222-x](https://doi.org/10.1016/0092-8674(88)90222-x)
- Brewer, B.J., Fangman, W.L., 1987. The localization of replication origins on ARS plasmids in *S. cerevisiae*. *Cell* 51, 463–471. [https://doi.org/10.1016/0092-8674\(87\)90642-8](https://doi.org/10.1016/0092-8674(87)90642-8)
- Brewer, B.J., Lockshon, D., Fangman, W.L., 1992. The arrest of replication forks in the rDNA of yeast occurs independently of transcription. *Cell* 71, 267–276. [https://doi.org/10.1016/0092-8674\(92\)90355-g](https://doi.org/10.1016/0092-8674(92)90355-g)
- Buchwalter, A., Hetzer, M.W., 2017. Nucleolar expansion and elevated protein translation in premature aging. *Nat. Commun.* 8, 328. <https://doi.org/10.1038/s41467-017-00322-z>
- Burkhalter, M.D., Sogo, J.M., 2004. rDNA enhancer affects replication initiation and mitotic recombination: Fob1 mediates nucleolytic processing independently of replication. *Mol. Cell* 15, 409–421. <https://doi.org/10.1016/j.molcel.2004.06.024>
- Chernoff, Y.O., Vincent, A., Liebman, S.W., 1994. Mutations in eukaryotic 18S ribosomal RNA affect translational fidelity and resistance to aminoglycoside antibiotics. *EMBO J.* 13, 906–913.
- Cherry, J.M., Hong, E.L., Amundsen, C., Balakrishnan, R., Binkley, G., Chan, E.T., Christie, K.R., Costanzo, M.C., Dwight, S.S., Engel, S.R., Fisk, D.G., Hirschman, J.E., Hitz, B.C., Karra, K., Krieger, C.J., Miyasato, S.R., Nash, R.S., Park, J., Skrzypek, M.S., Simison, M., Weng, S., Wong, E.D., 2012. Saccharomyces Genome Database: the genomics resource of budding yeast. *Nucleic Acids Res.* 40, D700-705. <https://doi.org/10.1093/nar/gkr1029>
- Chojnowski, A., Ong, P.F., Foo, M.X.R., Liebl, D., Hor, L.-P., Stewart, C.L., Dreesen, O., 2020. Heterochromatin loss as a determinant of progerin-induced DNA damage in Hutchinson-Gilford Progeria. *Aging Cell* 19, e13108. <https://doi.org/10.1111/accel.13108>
- Coffman, F.D., He, M., Diaz, M.-L., Cohen, S., 2006. Multiple initiation sites within the human ribosomal RNA gene. *Cell Cycle Georget. Tex* 5, 1223–1233. <https://doi.org/10.4161/cc.5.11.2814>
- Coffman, F.D., He, M., Diaz, M.-L., Cohen, S., 2005. DNA replication initiates at different sites in early and late S phase within human ribosomal RNA genes. *Cell Cycle Georget. Tex* 4, 1223–1226. <https://doi.org/10.4161/cc.4.9.1961>
- Collart, C., Allen, G.E., Bradshaw, C.R., Smith, J.C., Zegerman, P., 2013. Titration of four replication factors is essential for the *Xenopus laevis* midblastula transition. *Science* 341, 893–896. <https://doi.org/10.1126/science.1241530>
- Concia, L., Brooks, A.M., Wheeler, E., Zynda, G.J., Wear, E.E., LeBlanc, C., Song, J., Lee, T.-J., Pascuzzi, P.E., Martienssen, R.A., Vaughn, M.W., Thompson, W.F., Hanley-Bowdoin, L., 2018. Genome-Wide Analysis of the Arabidopsis Replication Timing Program. *Plant Physiol.* 176, 2166–2185. <https://doi.org/10.1104/pp.17.01537>
- Conconi, A., Sogo, J.M., Ryan, C.A., 1992. Ribosomal gene clusters are uniquely proportioned between open and closed chromatin structures in both tomato leaf cells and exponentially

- growing suspension cultures. *Proc. Natl. Acad. Sci. U. S. A.* 89, 5256–5260.  
<https://doi.org/10.1073/pnas.89.12.5256>
- Conconi, A., Widmer, R.M., Koller, T., Sogo, J.M., 1989. Two different chromatin structures coexist in ribosomal RNA genes throughout the cell cycle. *Cell* 57, 753–761.  
[https://doi.org/10.1016/0092-8674\(89\)90790-3](https://doi.org/10.1016/0092-8674(89)90790-3)
- Dammann, R., Lucchini, R., Koller, T., Sogo, J.M., 1993. Chromatin structures and transcription of rDNA in yeast *Saccharomyces cerevisiae*. *Nucleic Acids Res.* 21, 2331–2338.  
<https://doi.org/10.1093/nar/21.10.2331>
- D’Amours, D., Amon, A., 2004. At the interface between signaling and executing anaphase-- Cdc14 and the FEAR network. *Genes Dev.* 18, 2581–2595.  
<https://doi.org/10.1101/gad.1247304>
- Dauban, L., Kamgoué, A., Wang, R., Léger-Silvestre, I., Beckouët, F., Cantaloube, S., Gadad, O., 2019. Quantification of the dynamic behaviour of ribosomal DNA genes and nucleolus during yeast *Saccharomyces cerevisiae* cell cycle. *J. Struct. Biol.* 208, 152–164.  
<https://doi.org/10.1016/j.jsb.2019.08.010>
- Davé, A., Cooley, C., Garg, M., Bianchi, A., 2014. Protein phosphatase 1 recruitment by Rif1 regulates DNA replication origin firing by counteracting DDK activity. *Cell Rep.* 7, 53–61. <https://doi.org/10.1016/j.celrep.2014.02.019>
- Delany, M.E., Muscarella, D.E., Bloom, S.E., 1994. Effects of rRNA Gene Copy Number and Nucleolar Variation on Early Development: Inhibition of Gastrulation in rDNA-Deficient Chick Embryo. *J. Hered.* 85, 211–217.  
<https://doi.org/10.1093/oxfordjournals.jhered.a111437>
- Egidi, A., Di Felice, F., Camilloni, G., 2020. *Saccharomyces cerevisiae* rDNA as super-hub: the region where replication, transcription and recombination meet. *Cell. Mol. Life Sci. CMLS* 77, 4787–4798. <https://doi.org/10.1007/s00018-020-03562-3>
- Eissler, C.L., Mazón, G., Powers, B.L., Savinov, S.N., Symington, L.S., Hall, M.C., 2014. The Cdk/cDc14 module controls activation of the Yen1 holliday junction resolvase to promote genome stability. *Mol. Cell* 54, 80–93.  
<https://doi.org/10.1016/j.molcel.2014.02.012>
- Feng, W., Collingwood, D., Boeck, M.E., Fox, L.A., Alvino, G.M., Fangman, W.L., Raghuraman, M.K., Brewer, B.J., 2006. Genomic mapping of single-stranded DNA in hydroxyurea-challenged yeasts identifies origins of replication. *Nat. Cell Biol.* 8, 148–155. <https://doi.org/10.1038/ncb1358>
- Ferguson, B.M., Fangman, W.L., 1992. A position effect on the time of replication origin activation in yeast. *Cell* 68, 333–339. [https://doi.org/10.1016/0092-8674\(92\)90474-q](https://doi.org/10.1016/0092-8674(92)90474-q)
- Foss, E.J., Gathbonton-Schwager, T., Thiesen, A.H., Taylor, E., Soriano, R., Lao, U., MacAlpine, D.M., Bedalov, A., 2019. Sir2 suppresses transcription-mediated displacement of Mcm2-7 replicative helicases at the ribosomal DNA repeats. *PLoS Genet.* 15, e1008138. <https://doi.org/10.1371/journal.pgen.1008138>

- Foss, E.J., Lao, U., Dalrymple, E., Adrianse, R.L., Loe, T., Bedalov, A., 2017. SIR2 suppresses replication gaps and genome instability by balancing replication between repetitive and unique sequences. *Proc. Natl. Acad. Sci. U. S. A.* 114, 552–557. <https://doi.org/10.1073/pnas.1614781114>
- French, S.L., Osheim, Y.N., Cioci, F., Nomura, M., Beyer, A.L., 2003. In Exponentially Growing *Saccharomyces cerevisiae* Cells, rRNA Synthesis Is Determined by the Summed RNA Polymerase I Loading Rate Rather than by the Number of Active Genes. *Mol. Cell. Biol.* 23, 1558–1568. <https://doi.org/10.1128/MCB.23.5.1558-1568.2003>
- Friedel, A.M., Pike, B.L., Gasser, S.M., 2009. ATR/Mec1: coordinating fork stability and repair. *Curr. Opin. Cell Biol.* 21, 237–244. <https://doi.org/10.1016/j.ceb.2009.01.017>
- Friedman, K.L., Brewer, B.J., Fangman, W.L., 1997. Replication profile of *Saccharomyces cerevisiae* chromosome VI. *Genes Cells Devoted Mol. Cell. Mech.* 2, 667–678. <https://doi.org/10.1046/j.1365-2443.1997.1520350.x>
- Gibbons, J.G., Branco, A.T., Yu, S., Lemos, B., 2014. Ribosomal DNA copy number is coupled with gene expression variation and mitochondrial abundance in humans. *Nat. Commun.* 5, 4850. <https://doi.org/10.1038/ncomms5850>
- Hafner, L., Lezaja, A., Zhang, X., Lemmens, L., Shyian, M., Albert, B., Follonier, C., Nunes, J.M., Lopes, M., Shore, D., Mattarocci, S., 2018. Rif1 Binding and Control of Chromosome-Internal DNA Replication Origins Is Limited by Telomere Sequestration. *Cell Rep.* 23, 983–992. <https://doi.org/10.1016/j.celrep.2018.03.113>
- Hartwell, L.H., Culotti, J., Pringle, J.R., Reid, B.J., 1974. Genetic control of the cell division cycle in yeast. *Science* 183, 46–51. <https://doi.org/10.1126/science.183.4120.46>
- Hennessy, K.M., Lee, A., Chen, E., Botstein, D., 1991. A group of interacting yeast DNA replication genes. *Genes Dev.* 5, 958–969. <https://doi.org/10.1101/gad.5.6.958>
- Hiraga, S.-I., Alvino, G.M., Chang, F., Lian, H.-Y., Sridhar, A., Kubota, T., Brewer, B.J., Weinreich, M., Raghuraman, M.K., Donaldson, A.D., 2014. Rif1 controls DNA replication by directing Protein Phosphatase 1 to reverse Cdc7-mediated phosphorylation of the MCM complex. *Genes Dev.* 28, 372–383. <https://doi.org/10.1101/gad.231258.113>
- Ho, B., Baryshnikova, A., Brown, G.W., 2018. Unification of Protein Abundance Datasets Yields a Quantitative *Saccharomyces cerevisiae* Proteome. *Cell Syst.* 6, 192-205.e3. <https://doi.org/10.1016/j.cels.2017.12.004>
- Hoang, M.L., Leon, R.P., Pessoa-Brandao, L., Hunt, S., Raghuraman, M.K., Fangman, W.L., Brewer, B.J., Sclafani, R.A., 2007. Structural changes in Mcm5 protein bypass Cdc7-Dbf4 function and reduce replication origin efficiency in *Saccharomyces cerevisiae*. *Mol. Cell. Biol.* 27, 7594–7602. <https://doi.org/10.1128/MCB.00997-07>
- Hoggard, T., Müller, C.A., Nieduszynski, C.A., Weinreich, M., Fox, C.A., 2020. Sir2 mitigates an intrinsic imbalance in origin licensing efficiency between early- and late-replicating euchromatin. *Proc. Natl. Acad. Sci. U. S. A.* 117, 14314–14321. <https://doi.org/10.1073/pnas.2004664117>

- Hoggard, T.A., Chang, F., Perry, K.R., Subramanian, S., Kenworthy, J., Chueng, J., Shor, E., Hyland, E.M., Boeke, J.D., Weinreich, M., Fox, C.A., 2018. Yeast heterochromatin regulators Sir2 and Sir3 act directly at euchromatic DNA replication origins. *PLoS Genet.* 14, e1007418. <https://doi.org/10.1371/journal.pgen.1007418>
- Huang, J., Brito, I.L., Villén, J., Gygi, S.P., Amon, A., Moazed, D., 2006. Inhibition of homologous recombination by a cohesin-associated clamp complex recruited to the rDNA recombination enhancer. *Genes Dev.* 20, 2887–2901. <https://doi.org/10.1101/gad.1472706>
- Huang, J., Moazed, D., 2003. Association of the RENT complex with nontranscribed and coding regions of rDNA and a regional requirement for the replication fork block protein Fob1 in rDNA silencing. *Genes Dev.* 17, 2162–2176. <https://doi.org/10.1101/gad.1108403>
- Huh, W.-K., Falvo, J.V., Gerke, L.C., Carroll, A.S., Howson, R.W., Weissman, J.S., O’Shea, E.K., 2003. Global analysis of protein localization in budding yeast. *Nature* 425, 686–691. <https://doi.org/10.1038/nature02026>
- Hyrien, O., Méchali, M., 1992. Plasmid replication in *Xenopus* eggs and egg extracts: a 2D gel electrophoretic analysis. *Nucleic Acids Res.* 20, 1463–1469. <https://doi.org/10.1093/nar/20.7.1463>
- Ide, S., Miyazaki, T., Maki, H., Kobayashi, T., 2010. Abundance of ribosomal RNA gene copies maintains genome integrity. *Science* 327, 693–696. <https://doi.org/10.1126/science.1179044>
- Ide, S., Watanabe, K., Watanabe, H., Shirahige, K., Kobayashi, T., Maki, H., 2007. Abnormality in initiation program of DNA replication is monitored by the highly repetitive rRNA gene array on chromosome XII in budding yeast. *Mol. Cell. Biol.* 27, 568–578. <https://doi.org/10.1128/MCB.00731-06>
- Kaiser, B.K., Nachury, M.V., Gardner, B.E., Jackson, P.K., 2004. *Xenopus* Cdc14 alpha/beta are localized to the nucleolus and centrosome and are required for embryonic cell division. *BMC Cell Biol.* 5, 27. <https://doi.org/10.1186/1471-2121-5-27>
- Kaneva, I.N., Sudbery, I.M., Dickman, M.J., Sudbery, P.E., 2019. Proteins that physically interact with the phosphatase Cdc14 in *Candida albicans* have diverse roles in the cell cycle. *Sci. Rep.* 9, 6258. <https://doi.org/10.1038/s41598-019-42530-1>
- Khmelniskii, A., Lawrence, C., Roostalu, J., Schiebel, E., 2007. Cdc14-regulated midzone assembly controls anaphase B. *J. Cell Biol.* 177, 981–993. <https://doi.org/10.1083/jcb.200702145>
- Kim, Y.-H., Ishikawa, D., Ha, H.P., Sugiyama, M., Kaneko, Y., Harashima, S., 2006. Chromosome XII context is important for rDNA function in yeast. *Nucleic Acids Res.* 34, 2914–2924. <https://doi.org/10.1093/nar/gkl293>
- Kobayashi, T., 2003. The replication fork barrier site forms a unique structure with Fob1p and inhibits the replication fork. *Mol. Cell. Biol.* 23, 9178–9188. <https://doi.org/10.1128/mcb.23.24.9178-9188.2003>



- Kobayashi, T., Heck, D.J., Nomura, M., Horiuchi, T., 1998. Expansion and contraction of ribosomal DNA repeats in *Saccharomyces cerevisiae*: requirement of replication fork blocking (Fob1) protein and the role of RNA polymerase I. *Genes Dev.* 12, 3821–3830. <https://doi.org/10.1101/gad.12.24.3821>
- Kobayashi, T., Nomura, M., Horiuchi, T., 2001. Identification of DNA cis elements essential for expansion of ribosomal DNA repeats in *Saccharomyces cerevisiae*. *Mol. Cell. Biol.* 21, 136–147. <https://doi.org/10.1128/MCB.21.1.136-147.2001>
- Krawczyk, C., Dion, V., Schär, P., Fritsch, O., 2014. Reversible Top1 cleavage complexes are stabilized strand-specifically at the ribosomal replication fork barrier and contribute to ribosomal DNA stability. *Nucleic Acids Res.* 42, 4985–4995. <https://doi.org/10.1093/nar/gku148>
- Kulak, N.A., Pichler, G., Paron, I., Nagaraj, N., Mann, M., 2014. Minimal, encapsulated proteomic-sample processing applied to copy-number estimation in eukaryotic cells. *Nat. Methods* 11, 319–324. <https://doi.org/10.1038/nmeth.2834>
- Kwan, E.X., Foss, E.J., Tsuchiyama, S., Alvino, G.M., Kruglyak, L., Kaeberlein, M., Raghuraman, M.K., Brewer, B.J., Kennedy, B.K., Bedalov, A., 2013. A natural polymorphism in rDNA replication origins links origin activation with calorie restriction and lifespan. *PLoS Genet.* 9, e1003329. <https://doi.org/10.1371/journal.pgen.1003329>
- Kwan, E.X., Wang, X.S., Amemiya, H.M., Brewer, B.J., Raghuraman, M.K., 2016. rDNA Copy Number Variants Are Frequent Passenger Mutations in *Saccharomyces cerevisiae* Deletion Collections and de Novo Transformants. *G3 Bethesda Md* 6, 2829–2838. <https://doi.org/10.1534/g3.116.030296>
- Labit, H., Perewoska, I., Germe, T., Hyrien, O., Marheineke, K., 2008. DNA replication timing is deterministic at the level of chromosomal domains but stochastic at the level of replicons in *Xenopus* egg extracts. *Nucleic Acids Res.* 36, 5623–5634. <https://doi.org/10.1093/nar/gkn533>
- Linskens, M.H., Huberman, J.A., 1988. Organization of replication of ribosomal DNA in *Saccharomyces cerevisiae*. *Mol. Cell. Biol.* 8, 4927–4935. <https://doi.org/10.1128/mcb.8.11.4927>
- Little, R.D., Platt, T.H., Schildkraut, C.L., 1993. Initiation and termination of DNA replication in human rRNA genes. *Mol. Cell. Biol.* 13, 6600–6613. <https://doi.org/10.1128/mcb.13.10.6600>
- Longtine, M.S., McKenzie, A., Demarini, D.J., Shah, N.G., Wach, A., Brachat, A., Philippsen, P., Pringle, J.R., 1998. Additional modules for versatile and economical PCR-based gene deletion and modification in *Saccharomyces cerevisiae*. *Yeast Chichester Engl.* 14, 953–961. [https://doi.org/10.1002/\(SICI\)1097-0061\(199807\)14:10<953::AID-YEA293>3.0.CO;2-U](https://doi.org/10.1002/(SICI)1097-0061(199807)14:10<953::AID-YEA293>3.0.CO;2-U)
- López-estraño, C., Schwartzman, J.B., Krimer, D.B., Hernández, P., 1998. Co-localization of polar replication fork barriers and rRNA transcription terminators in mouse rDNA. *J. Mol. Biol.* 277, 249–256. <https://doi.org/10.1006/jmbi.1997.1607>

- Lu, K.L., Nelson, J.O., Watase, G.J., Warsinger-Pepe, N., Yamashita, Y.M., 2018. Transgenerational dynamics of rDNA copy number in *Drosophila* male germline stem cells. *eLife* 7. <https://doi.org/10.7554/eLife.32421>
- Lynch, K.L., Alvino, G.M., Kwan, E.X., Brewer, B.J., Raghuraman, M.K., 2019. The effects of manipulating levels of replication initiation factors on origin firing efficiency in yeast. *PLoS Genet.* 15, e1008430. <https://doi.org/10.1371/journal.pgen.1008430>
- Maine, G.T., Sinha, P., Tye, B.K., 1984. Mutants of *S. cerevisiae* defective in the maintenance of minichromosomes. *Genetics* 106, 365–385.
- Maiti, A.K., Sinha, P., 1992. The *mcm2* mutation of yeast affects replication, rather than segregation or amplification of the two micron plasmid. *J. Mol. Biol.* 224, 545–558. [https://doi.org/10.1016/0022-2836\(92\)90543-s](https://doi.org/10.1016/0022-2836(92)90543-s)
- Mantiero, D., Mackenzie, A., Donaldson, A., Zegerman, P., 2011. Limiting replication initiation factors execute the temporal programme of origin firing in budding yeast. *EMBO J.* 30, 4805–4814. <https://doi.org/10.1038/emboj.2011.404>
- Manzano-López, J., Monje-Casas, F., 2020. The Multiple Roles of the Cdc14 Phosphatase in Cell Cycle Control. *Int. J. Mol. Sci.* 21. <https://doi.org/10.3390/ijms21030709>
- Masumoto, H., Muramatsu, S., Kamimura, Y., Araki, H., 2002. S-Cdk-dependent phosphorylation of Sld2 essential for chromosomal DNA replication in budding yeast. *Nature* 415, 651–655. <https://doi.org/10.1038/nature713>
- Mattarocci, S., Shyian, M., Lemmens, L., Damay, P., Altintas, D.M., Shi, T., Bartholomew, C.R., Thomä, N.H., Hardy, C.F.J., Shore, D., 2014. Rif1 controls DNA replication timing in yeast through the PP1 phosphatase Glc7. *Cell Rep.* 7, 62–69. <https://doi.org/10.1016/j.celrep.2014.03.010>
- McStay, B., Grummt, I., 2008. The Epigenetics of rRNA Genes: From Molecular to Chromosome Biology. *Annu. Rev. Cell Dev. Biol.* 24, 131–157. <https://doi.org/10.1146/annurev.cellbio.24.110707.175259>
- Michel, A.H., Kornmann, B., Dubrana, K., Shore, D., 2005. Spontaneous rDNA copy number variation modulates Sir2 levels and epigenetic gene silencing. *Genes Dev.* 19, 1199–1210. <https://doi.org/10.1101/gad.340205>
- Miller, C.A., Kowalski, D., 1993. cis-acting components in the replication origin from ribosomal DNA of *Saccharomyces cerevisiae*. *Mol. Cell. Biol.* 13, 5360–5369. <https://doi.org/10.1128/mcb.13.9.5360>
- Minchell, N.E., Keszthelyi, A., Baxter, J., 2020. Cohesin Causes Replicative DNA Damage by Trapping DNA Topological Stress. *Mol. Cell* 78, 739-751.e8. <https://doi.org/10.1016/j.molcel.2020.03.013>
- Mohan, J., Ritossa, F.M., 1970. Regulation of ribosomal RNA synthesis and its bearing on the bobbed phenotype in *Drosophila melanogaster*. *Dev. Biol.* 22, 495–512. [https://doi.org/10.1016/0012-1606\(70\)90165-x](https://doi.org/10.1016/0012-1606(70)90165-x)

- Mohl, D.A., Huddleston, M.J., Collingwood, T.S., Annan, R.S., Deshaies, R.J., 2009. Dbf2-Mob1 drives relocalization of protein phosphatase Cdc14 to the cytoplasm during exit from mitosis. *J Cell Biol* 184, 527–539. <https://doi.org/10.1083/jcb.200812022>
- Morton, E.A., Hall, A.N., Kwan, E., Mok, C., Queitsch, K., Nandakumar, V., Stamatoyannopoulos, J., Brewer, B.J., Waterston, R., Queitsch, C., 2020. Challenges and Approaches to Genotyping Repetitive DNA. *G3 Bethesda Md* 10, 417–430. <https://doi.org/10.1534/g3.119.400771>
- Nelson, J.O., Watase, G.J., Warsinger-Pepe, N., Yamashita, Y.M., 2019. Mechanisms of rDNA Copy Number Maintenance. *Trends Genet. TIG* 35, 734–742. <https://doi.org/10.1016/j.tig.2019.07.006>
- Nieduszynski, C.A., Hiraga, S., Ak, P., Benham, C.J., Donaldson, A.D., 2007. OriDB: a DNA replication origin database. *Nucleic Acids Res.* 35, D40–46. <https://doi.org/10.1093/nar/gkl758>
- Paredes, S., Branco, A.T., Hartl, D.L., Maggert, K.A., Lemos, B., 2011. Ribosomal DNA deletions modulate genome-wide gene expression: “rDNA-sensitive” genes and natural variation. *PLoS Genet.* 7, e1001376. <https://doi.org/10.1371/journal.pgen.1001376>
- Parks, M.M., Kurylo, C.M., Dass, R.A., Bojmar, L., Lyden, D., Vincent, C.T., Blanchard, S.C., 2018. Variant ribosomal RNA alleles are conserved and exhibit tissue-specific expression. *Sci. Adv.* 4, eaao0665. <https://doi.org/10.1126/sciadv.aao0665>
- Paulovich, A.G., Hartwell, L.H., 1995. A checkpoint regulates the rate of progression through S phase in *S. cerevisiae* in response to DNA damage. *Cell* 82, 841–847. [https://doi.org/10.1016/0092-8674\(95\)90481-6](https://doi.org/10.1016/0092-8674(95)90481-6)
- Picart-Piccolo, A., Grob, S., Picault, N., Franek, M., Llauro, C., Halter, T., Maier, T.R., Jobet, E., Descombin, J., Zhang, P., Paramasivan, V., Baum, T.J., Navarro, L., Dvořáčková, M., Mirouze, M., Pontvianne, F., 2020. Large tandem duplications affect gene expression, 3D organization, and plant-pathogen response. *Genome Res.* 30, 1583–1592. <https://doi.org/10.1101/gr.261586.120>
- Radford, A., 1991. *Methods in yeast genetics — A laboratory course manual* by M Rose, F Winston and P Hieter. pp 198. Cold Spring Harbor Laboratory Press, Cold Spring Harbor, New York. 1990. \$34 ISBN 0-87969-354-1. *Biochem. Educ.* 19, 101–102. [https://doi.org/10.1016/0307-4412\(91\)90039-B](https://doi.org/10.1016/0307-4412(91)90039-B)
- Raghuraman, M.K., Winzeler, E.A., Collingwood, D., Hunt, S., Wodicka, L., Conway, A., Lockhart, D.J., Davis, R.W., Brewer, B.J., Fangman, W.L., 2001. Replication dynamics of the yeast genome. *Science* 294, 115–121. <https://doi.org/10.1126/science.294.5540.115>
- Ritossa, F.M., Atwood, K.C., 1966. Unequal proportions of DNA complementary to ribosomal RNA in males and females of *Drosophila simulans*. *Proc. Natl. Acad. Sci. U. S. A.* 56, 496–499.

- Rosado, I.V., Kressler, D., de la Cruz, J., 2007. Functional analysis of *Saccharomyces cerevisiae* ribosomal protein Rpl3p in ribosome synthesis. *Nucleic Acids Res.* 35, 4203–4213. <https://doi.org/10.1093/nar/gkm388>
- Saito, R.M., Perreault, A., Peach, B., Satterlee, J.S., van den Heuvel, S., 2004. The CDC-14 phosphatase controls developmental cell-cycle arrest in *C. elegans*. *Nat. Cell Biol.* 6, 777–783. <https://doi.org/10.1038/ncb1154>
- Saka, K., Ide, S., Ganley, A.R.D., Kobayashi, T., 2013. Cellular senescence in yeast is regulated by rDNA noncoding transcription. *Curr. Biol. CB* 23, 1794–1798. <https://doi.org/10.1016/j.cub.2013.07.048>
- Salim, D., Bradford, W.D., Freeland, A., Cady, G., Wang, J., Pruitt, S.C., Gerton, J.L., 2017. DNA replication stress restricts ribosomal DNA copy number. *PLoS Genet.* 13, e1007006. <https://doi.org/10.1371/journal.pgen.1007006>
- Salim, D., Bradford, W.D., Rubinstein, B., Gerton, J.L., 2021. DNA replication, transcription, and H3K56 acetylation regulate copy number and stability at tandem repeats. *G3 Bethesda Md.* <https://doi.org/10.1093/g3journal/jkab082>
- Sanchez, J.C., Kwan, E.X., Pohl, T.J., Amemiya, H.M., Raghuraman, M.K., Brewer, B.J., 2017. Defective replication initiation results in locus specific chromosome breakage and a ribosomal RNA deficiency in yeast. *PLoS Genet.* 13, e1007041. <https://doi.org/10.1371/journal.pgen.1007041>
- Santocanale, C., Diffley, J.F., 1998. A Mec1- and Rad53-dependent checkpoint controls late-firing origins of DNA replication. *Nature* 395, 615–618. <https://doi.org/10.1038/27001>
- Schübeler, D., Scalzo, D., Kooperberg, C., van Steensel, B., Delrow, J., Groudine, M., 2002. Genome-wide DNA replication profile for *Drosophila melanogaster*: a link between transcription and replication timing. *Nat. Genet.* 32, 438–442. <https://doi.org/10.1038/ng1005>
- Schwob, E., Böhm, T., Mendenhall, M.D., Nasmyth, K., 1994. The B-type cyclin kinase inhibitor p40SIC1 controls the G1 to S transition in *S. cerevisiae*. *Cell* 79, 233–244. [https://doi.org/10.1016/0092-8674\(94\)90193-7](https://doi.org/10.1016/0092-8674(94)90193-7)
- Schwob, E., Nasmyth, K., 1993. CLB5 and CLB6, a new pair of B cyclins involved in DNA replication in *Saccharomyces cerevisiae*. *Genes Dev.* 7, 1160–1175. <https://doi.org/10.1101/gad.7.7a.1160>
- Segurado, M., Tercero, J.A., 2009. The S-phase checkpoint: targeting the replication fork. *Biol. Cell* 101, 617–627. <https://doi.org/10.1042/BC20090053>
- Shima, N., Alcaraz, A., Liachko, I., Buske, T.R., Andrews, C.A., Munroe, R.J., Hartford, S.A., Tye, B.K., Schimenti, J.C., 2007. A viable allele of Mcm4 causes chromosome instability and mammary adenocarcinomas in mice. *Nat. Genet.* 39, 93–98. <https://doi.org/10.1038/ng1936>

- Shimada, K., Pasero, P., Gasser, S.M., 2002. ORC and the intra-S-phase checkpoint: a threshold regulates Rad53p activation in S phase. *Genes Dev.* 16, 3236–3252. <https://doi.org/10.1101/gad.239802>
- Shou, W., Seol, J.H., Shevchenko, A., Baskerville, C., Moazed, D., Chen, Z.W., Jang, J., Shevchenko, A., Charbonneau, H., Deshaies, R.J., 1999. Exit from mitosis is triggered by Tem1-dependent release of the protein phosphatase Cdc14 from nucleolar RENT complex. *Cell* 97, 233–244. [https://doi.org/10.1016/s0092-8674\(00\)80733-3](https://doi.org/10.1016/s0092-8674(00)80733-3)
- Shyian, M., Mattarocci, S., Albert, B., Hafner, L., Lezaja, A., Costanzo, M., Boone, C., Shore, D., 2016. Budding Yeast Rif1 Controls Genome Integrity by Inhibiting rDNA Replication. *PLoS Genet.* 12, e1006414. <https://doi.org/10.1371/journal.pgen.1006414>
- Smith, J.S., Boeke, J.D., 1997. An unusual form of transcriptional silencing in yeast ribosomal DNA. *Genes Dev.* 11, 241–254. <https://doi.org/10.1101/gad.11.2.241>
- Stegmeier, F., Huang, J., Rahal, R., Zmolik, J., Moazed, D., Amon, A., 2004. The replication fork block protein Fob1 functions as a negative regulator of the FEAR network. *Curr. Biol.* CB 14, 467–480. <https://doi.org/10.1016/j.cub.2004.03.009>
- Stinchcomb, D.T., Struhl, K., Davis, R.W., 1979. Isolation and characterisation of a yeast chromosomal replicator. *Nature* 282, 39–43. <https://doi.org/10.1038/282039a0>
- Storici, F., Oberto, J., Bruschi, C.V., 1995. The CDC6 gene is required for centromeric, episomal, and 2-microns plasmid stability in the yeast *Saccharomyces cerevisiae*. *Plasmid* 34, 184–197. <https://doi.org/10.1006/plas.1995.0004>
- Thaminy, S., Newcomb, B., Kim, J., Gatbonton, T., Foss, E., Simon, J., Bedalov, A., 2007. Hst3 is regulated by Mec1-dependent proteolysis and controls the S phase checkpoint and sister chromatid cohesion by deacetylating histone H3 at lysine 56. *J. Biol. Chem.* 282, 37805–37814. <https://doi.org/10.1074/jbc.M706384200>
- Thompson, O., Edgley, M., Strasbourger, P., Flibotte, S., Ewing, B., Adair, R., Au, V., Chaudhry, I., Fernando, L., Hutter, H., Kieffer, A., Lau, J., Lee, N., Miller, A., Raymant, G., Shen, B., Shendure, J., Taylor, J., Turner, E.H., Hillier, L.W., Moerman, D.G., Waterston, R.H., 2013. The million mutation project: a new approach to genetics in *Caenorhabditis elegans*. *Genome Res.* 23, 1749–1762. <https://doi.org/10.1101/gr.157651.113>
- Trabold, P.A., Weinberger, M., Feng, L., Burhans, W.C., 2005. Activation of budding yeast replication origins and suppression of lethal DNA damage effects on origin function by ectopic expression of the co-chaperone protein Mge1. *J. Biol. Chem.* 280, 12413–12421. <https://doi.org/10.1074/jbc.M411327200>
- Tsuchiyama, S., Kwan, E., Dang, W., Bedalov, A., Kennedy, B.K., 2013. Sirtuins in yeast: phenotypes and tools. *Methods Mol. Biol.* Clifton NJ 1077, 11–37. [https://doi.org/10.1007/978-1-62703-637-5\\_2](https://doi.org/10.1007/978-1-62703-637-5_2)
- Tye, B.K., 1999. Minichromosome maintenance as a genetic assay for defects in DNA replication. *Methods San Diego Calif* 18, 329–334. <https://doi.org/10.1006/meth.1999.0793>

- Verma, R., Annan, R.S., Huddleston, M.J., Carr, S.A., Reynard, G., Deshaies, R.J., 1997. Phosphorylation of Sic1p by G1 Cdk required for its degradation and entry into S phase. *Science* 278, 455–460. <https://doi.org/10.1126/science.278.5337.455>
- Villoria, M.T., Ramos, F., Dueñas, E., Faull, P., Cutillas, P.R., Clemente-Blanco, A., 2017. Stabilization of the metaphase spindle by Cdc14 is required for recombinational DNA repair. *EMBO J.* 36, 79–101. <https://doi.org/10.15252/embj.201593540>
- Visintin, R., Craig, K., Hwang, E.S., Prinz, S., Tyers, M., Amon, A., 1998. The phosphatase Cdc14 triggers mitotic exit by reversal of Cdk-dependent phosphorylation. *Mol. Cell* 2, 709–718. [https://doi.org/10.1016/s1097-2765\(00\)80286-5](https://doi.org/10.1016/s1097-2765(00)80286-5)
- Visintin, R., Hwang, E.S., Amon, A., 1999. Cfi1 prevents premature exit from mitosis by anchoring Cdc14 phosphatase in the nucleolus. *Nature* 398, 818–823. <https://doi.org/10.1038/19775>
- Wang, M., Lemos, B., 2017. Ribosomal DNA copy number amplification and loss in human cancers is linked to tumor genetic context, nucleolus activity, and proliferation. *PLoS Genet.* 13, e1006994. <https://doi.org/10.1371/journal.pgen.1006994>
- Ward, T.R., Hoang, M.L., Prusty, R., Lau, C.K., Keil, R.L., Fangman, W.L., Brewer, B.J., 2000. Ribosomal DNA replication fork barrier and HOP1 recombination hot spot: shared sequences but independent activities. *Mol. Cell. Biol.* 20, 4948–4957. <https://doi.org/10.1128/mcb.20.13.4948-4957.2000>
- Woolford, J.L., Baserga, S.J., 2013. Ribosome biogenesis in the yeast *Saccharomyces cerevisiae*. *Genetics* 195, 643–681. <https://doi.org/10.1534/genetics.113.153197>
- Wu, J., Cho, H.P., Rhee, D.B., Johnson, D.K., Dunlap, J., Liu, Y., Wang, Y., 2008. Cdc14B depletion leads to centriole amplification, and its overexpression prevents unscheduled centriole duplication. *J. Cell Biol.* 181, 475–483. <https://doi.org/10.1083/jcb.200710127>
- Xu, B., Li, H., Perry, J.M., Singh, V.P., Unruh, J., Yu, Z., Zakari, M., McDowell, W., Li, L., Gerton, J.L., 2017. Ribosomal DNA copy number loss and sequence variation in cancer. *PLoS Genet.* 13, e1006771. <https://doi.org/10.1371/journal.pgen.1006771>
- Xue, Y., Rushton, M.D., Maringe, L., 2011. A novel checkpoint and RPA inhibitory pathway regulated by Rif1. *PLoS Genet.* 7, e1002417. <https://doi.org/10.1371/journal.pgen.1002417>
- Yabuki, N., Terashima, H., Kitada, K., 2002. Mapping of early firing origins on a replication profile of budding yeast. *Genes Cells Devoted Mol. Cell. Mech.* 7, 781–789. <https://doi.org/10.1046/j.1365-2443.2002.00559.x>
- Ye, J., Eickbush, T.H., 2006. Chromatin structure and transcription of the R1- and R2-inserted rRNA genes of *Drosophila melanogaster*. *Mol. Cell. Biol.* 26, 8781–8790. <https://doi.org/10.1128/MCB.01409-06>
- Yellman, C.M., Roeder, G.S., 2015. Cdc14 Early Anaphase Release, FEAR, Is Limited to the Nucleus and Dispensable for Efficient Mitotic Exit. *PloS One* 10, e0128604. <https://doi.org/10.1371/journal.pone.0128604>

Yoshida, K., Bacal, J., Desmarais, D., Padioleau, I., Tsaponina, O., Chabes, A., Pantesco, V., Dubois, E., Parrinello, H., Skrzypczak, M., Ginalska, K., Lengronne, A., Pasero, P., 2014. The histone deacetylases sir2 and rpd3 act on ribosomal DNA to control the replication program in budding yeast. *Mol. Cell* 54, 691–697.  
<https://doi.org/10.1016/j.molcel.2014.04.032>

Yoshida, K., Poveda, A., Pasero, P., 2013. Time to be versatile: regulation of the replication timing program in budding yeast. *J. Mol. Biol.* 425, 4696–4705.  
<https://doi.org/10.1016/j.jmb.2013.09.020>
